# 1 **A non-canonical histone acetyltransferase** 2 **targets intragenic enhancers and regulates** 3 **plant architecture**

4 Xueyong Yang<sup>1,8</sup>, Jianbin Yan<sup>2,3,8</sup>, Zhen Zhang<sup>4,5,8</sup>, Tao Lin<sup>2</sup>, Tongxu Xin<sup>1</sup>, Bowen  
5 Wang<sup>2</sup>, Shenhao Wang<sup>4</sup>, Jicheng Zhao<sup>6,7</sup>, Zhonghua Zhang<sup>1</sup>, William J. Lucas<sup>8</sup>,  
6 Guohong Li<sup>6,7</sup>, Sanwen Huang<sup>2\*</sup>

- 7 1. Key Laboratory of Biology and Genetic Improvement of Horticultural Crops of the  
8 Ministry of Agriculture, Sino-Dutch Joint Laboratory of Horticultural Genomics,  
9 Institute of Vegetables and Flowers, Chinese Academy of Agricultural Sciences,  
10 Beijing 100081, China
- 11 2. Shenzhen Branch, Guangdong Laboratory for Lingnan Modern Agriculture,  
12 Genome Analysis Laboratory of the Ministry of Agriculture, Agricultural  
13 Genomics Institute at Shenzhen, Chinese Academy of Agricultural Sciences,  
14 Shenzhen, Guangdong 518124, China
- 15 3. Center for Synthetic and Systems Biology, School of Life Sciences, Tsinghua  
16 University, Beijing, 100084, China.
- 17 4. College of Horticulture, Northwest A&F University, Yangling, Shaanxi 712100,  
18 China
- 19 5. State Key Laboratory of Crop Stress Adaptation and Improvement, School of Life  
20 Sciences, Henan University, 85 Minglun Street, Kaifeng 475001, China
- 21 6. National Laboratory of Biomacromolecules, CAS Center for Excellence in  
22 Biomacromolecules, Institute of Biophysics, Chinese Academy of Sciences,  
23 Beijing 100101, China
- 24 7. University of Chinese Academy of Sciences, Beijing 100049, China
- 25 8. Department of Plant Biology, College of Biological Sciences, University of  
26 California, Davis, CA 95616, USA

27 9. These authors contributed equally to this work: Xueyong Yang, Jianbin Yan and  
28 Zhen Zhang

29 \*Correspondence: [huangsanwen@caas.cn](mailto:huangsanwen@caas.cn)

30

## 31 **Abstract**

32 Axillary meristem development determines both plant architecture and crop yield; this  
33 critical process is regulated by the TCP transcription factor (TF) family, including the  
34 maize *TB1* and Arabidopsis *BRC1*. Studies have shown that both TB1 and AtBRC1 can  
35 target the gene body regions of some target genes and activate their expression;  
36 however, the regulatory mechanisms remain largely unknown. Here, we show that a  
37 cucumber *CYC/TB1* homologue, *TEN*, controls the identity and mobility of tendrils.  
38 Through its C-terminus, TEN binds at intragenic enhancers of target genes; its N-  
39 terminal domain functions as a novel, non-canonical histone acetyltransferase (HAT)  
40 to preferentially act on lysine 56 and 122, of the histone H3 globular domain. This HAT  
41 activity is responsible for chromatin loosening and host gene activation. The N-termini  
42 of all tested *CYC/TB1*-like proteins contain an intrinsically disordered region (IDR),  
43 and despite their sequence divergence, they have conserved HAT activity. This study  
44 discovered a non-canonical class of HATs, and as well, provides a mechanism by which  
45 modification at the H3 globular domain is integrated with the transcription process.

46 TEOSINTE BRANCHED 1 (TB1), CYCLOIDEA (CYC), and PROLIFERATING  
47 CELL FACTORS (TCP) transcription factors (TFs) constitute a plant-specific gene  
48 family involved in a broad range of developmental processes<sup>1</sup>. Among them, the  
49 CYC/TB1 clade of the TCP proteins plays central roles in controlling development of  
50 axillary buds that give rise to either flowers or lateral shoots<sup>1,2</sup>. In maize (*Zea mays* L.),  
51 the major domestication gene, *TB1*, suppresses branch outgrowth, a crucial  
52 architectural modification that transformed teosinte into a viable crop<sup>3</sup>. Subsequent  
53 studies on its homologues in rice<sup>4</sup> and *Arabidopsis thaliana*<sup>5</sup> identified their similar  
54 essential roles in repressing axillary bud growth.

55 Recently, a genome-wide binding profile uncovered a genetic pathway putatively  
56 regulated by TB1<sup>6</sup>. The study reported that TB1 binds mainly to promoters, with only  
57 a few peaks located within gene body regions. Nevertheless, other studies have also  
58 shown that TB1, and its homologue BRANCHED1 in *Arabidopsis*, can bind to the gene  
59 bodies of the target genes *Tassels Replace Upper Ears1 (Tru1)*<sup>7</sup> and *HOMEBOX*  
60 *PROTEIN53*<sup>8</sup>, respectively, to activate their expression. However, the mechanism  
61 underlying how the intragenic binding of CYC/TB1-like TFs regulates gene expression  
62 is still unclear. Understanding the conserved regulatory mechanism, associated with the  
63 function of these CYC/TB1-like proteins, would provide insight into their core role in  
64 signal integration of axillary bud repression. Such knowledge could broadly benefit  
65 crop breeding programs for tailored plant architecture.

66 In eukaryotes, enhancers are *cis*-acting DNA sequences which, when bound by  
67 specific TFs, increase the transcription in a manner that is independent of their  
68 orientation and distance relative to the transcription start site<sup>9</sup>. In *Drosophila*  
69 *melanogaster*, the vast majority (88%) of all enhancers were shown to be located in the  
70 vicinity of their targets, of which 30% are upstream, 22% are downstream, and  
71 interestingly, 36% are intragenic<sup>10</sup>. These intragenic enhancers appear to mainly (79%)  
72 regulate their host genes with only 21% activating neighboring genes<sup>10</sup>. The first  
73 eukaryotic intragenic enhancer was discovered in the immunoglobulin heavy chain  
74 gene<sup>11</sup>, and it was shown that this enhancer activity was correlated with an increase in  
75 histone acetylation and general sensitivity to digestion by DNase I<sup>12</sup>. Several models  
76 have been proposed regarding the action of enhancers in the regulation of transcription,  
77 of which a ‘facilitated tracking’ mechanism is of interest. In this model, an enhancer-

78 bound complex, containing DNA-binding TFs and coactivators, scans along the  
79 chromatin until it encounters the promoter, where a looped chromatin structure is  
80 formed. The key points of this tracking mechanism are altering a repressive chromatin  
81 structure and facilitating enhancer-promoter communication<sup>9</sup>. Overall, the mechanism  
82 regarding transcriptional regulation, by enhancers, is still poorly understood<sup>13</sup>.

83 The dynamics of chromatin structure are strictly regulated by multiple mechanisms,  
84 including post-translational modification of histones<sup>14,15</sup>. Tail-based histone acetylation  
85 functions as docking sites for the recruitment of transcriptional regulators, whereas  
86 recent data suggest that acetylation of lysine residues, in the globular domain of histone  
87 H3 (H3K56 and H3K122), can directly alter histone – DNA interactions, thereby  
88 modulating chromatin architecture<sup>16-18</sup> and stimulating transcription<sup>19-21</sup>. In yeast,  
89 histone chaperone-dependent acetylation of H3K56, by the histone acetyltransferase  
90 (HAT) Rtt109, is required for chromatin assembly, during DNA replication<sup>22-25</sup>, and for  
91 chromatin disassembly during transcriptional activation<sup>19,21</sup>. H3K56 acetylation  
92 enhances the unwrapping of DNA, close to the DNA entry–exit site of the nucleosome  
93 <sup>26</sup>, and regulates chromatin at a higher-order level<sup>27</sup>. It also appears that H3K56  
94 acetylation is involved in transcription elongation<sup>28,29</sup>. Similarly, in humans and *D.*  
95 *melanogaster*, the HATs CBP and p300 mediate the acetylation of H3K56, in an Asf1-  
96 dependent manner, which is required for chromatin assembly during DNA synthesis<sup>30</sup>.  
97 H3K122ac directly affects histone–DNA binding and stimulates transcription<sup>20</sup>.  
98 Recently, it was reported that a subset of active enhancers is marked by histone H3  
99 globular domain acetylation (H3K64ac and H3K122ac)<sup>31</sup>. However, the mechanism  
100 underlying *cis* and *trans* determinants of how the histone globular domain acetylation  
101 is integrated into specific genes, during transcriptional regulation, remains to be  
102 elucidated<sup>32</sup>.

103 Intrinsically disordered regions (IDRs) are polypeptide segments that lack  
104 sufficient hydrophobic amino acids to mediate co-operative folding, and thus, lack an  
105 ordered three-dimensional structure<sup>33,34</sup>. IDRs are abundant in eukaryotic proteins,  
106 being especially prevalent in TFs, and were recently considered to play important roles  
107 in gene activation, through the formation of biomolecular condensates (phase  
108 separation)<sup>13,35</sup>. However, the possible role and mechanism of action of IDRs, in  
109 transcriptional regulation, remains largely unexplored.

110 Recently, we identified the cucumber (*Cucumis sativus* L.) tendrils identity gene,  
111 *TEN*, which belongs to the *CYC/TB1* clade of the *TCP* gene family<sup>36</sup>. Tendrils are  
112 modified branches in which axillary meristems are inhibited from developing, and  
113 climbing behavior is acquired. To understand how *TEN* regulates target gene  
114 expression, we investigated the genome-wide binding profiles of *TEN*. We show that  
115 *TEN* acts both as an intragenic enhancer-binding TF and as a novel, non-canonical HAT,  
116 acting on H3K56 and K122 for host gene activation. Furthermore, we demonstrate that  
117 the N-termini of tested *CYC/TB1*-like proteins contain intrinsically disordered regions  
118 (IDRs), and despite their sequence divergence, they have conserved HAT activity.

## 119 **Results**

120 **Regulation of tendrils identity requires *TEN* N- and C-termini.** A cucumber *TEN*  
121 mutant forms modified branches, instead of tendrils, and had therefore lost the capacity  
122 to climb<sup>36</sup>. This *ten* gene had a single-point mutation (asparagine to tyrosine at the 338<sup>th</sup>  
123 amino acid residue; N338Y; *ten-1* mutant) in the *TEN* C-terminus, indicating an  
124 important function associated with this region<sup>36</sup> (Fig. 1a and Supplementary Fig. 1a-b).  
125 In order to knock out the *TEN* gene, and further explore *TEN*-associated functions, we  
126 employed CRISPR-Cas9 to target the *TEN* N121 region (amino acids 1 to 121 in the  
127 N-terminus) (Fig. 1a). These *TEN*-edited plants were phenotyped, and a null-mutant  
128 (*ten-2*; Fig. 1b) displayed a complete transformation of its tendrils into lateral branches  
129 (Fig. 1c-d), equivalent to the *ten-1* mutant phenotype (Supplementary Fig. 1b). This  
130 result confirmed the function of *TEN* in control of tendrils identity.

131 In addition to the *ten-2* null-mutant, we also identified two other *TEN*-edited plants,  
132 *ten-3* with a homozygous in-frame deletion of two amino acids (Gln<sup>54</sup> and Asp<sup>55</sup>), and  
133 *ten-4* with a homozygous in-frame deletion of 12 amino acids (Fig. 1b). We observed  
134 that in both *ten-3* and *ten-4* plants (Fig. 1e-g), some tendrils retained much of the normal  
135 tendrils morphology (Fig. 1g); however, interestingly, some showed slight  
136 morphological changes, producing axillary meristems on their tendrils (Fig. 1e-g),  
137 demonstrating the important role of *TEN* in axillary meristem inhibition, during tendrils  
138 development.

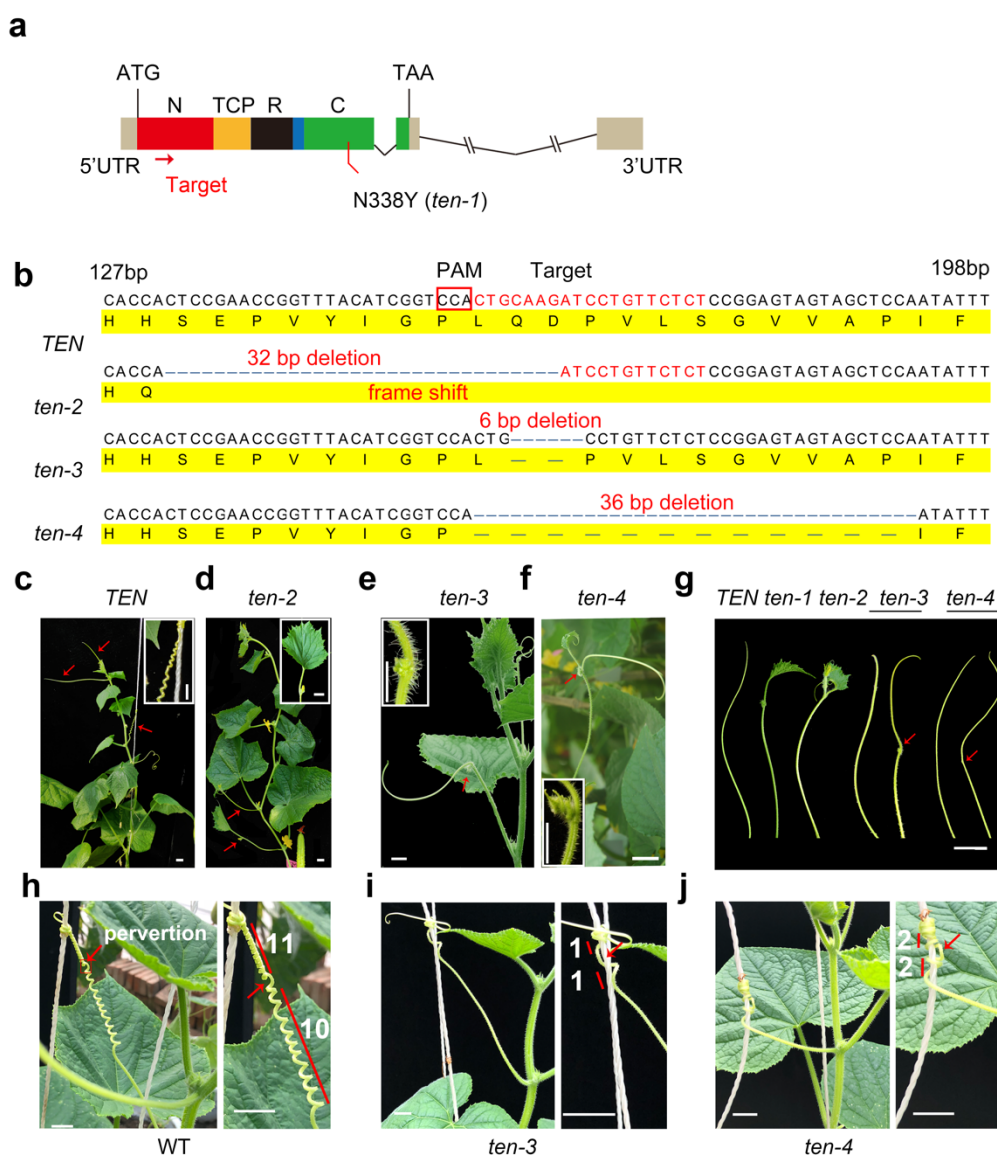

139  
 140 **Figure 1 | Analysis of CRISPR-Cas9 mutants reveals the *in vivo* role of TEN.** **a**, Schematic  
 141 illustrating the sgRNAs (red arrow) targeting the region in the N121 domain. Colored boxes  
 142 represent exons, and black lines represent introns. N338Y designates the *ten-1* mutant that  
 143 forms modified tendrils. **b**, Identification of the *ten-2* allele as a null mutation carrying a 32 bp  
 144 deletion, and alleles homozygous for genes encoding proteins with small deletions of two amino  
 145 acids (*ten-3*) and 12 amino acids (*ten-4*). Red font highlights sgRNA targets, and red box  
 146 indicates the protospacer-adjacent motif (PAM) sequence. **c** and **d**, Wild-type (WT) plant  
 147 bearing typical tendrils (red arrows), has the ability to climb (**c**), whereas the *ten-2* bears  
 148 modified tendrils (red arrows) and an inability to climb (**d**). **e** and **f**, Examples of *ten-3* (**e**) and  
 149 *ten-4* (**f**) tendrils on which axillary buds have developed. **g**, Tendril phenotypes of various  
 150 alleles for the *TEN* gene. **h-j**, Compared to WT (**h**), free coiling, formed by two oppositely  
 151 handed helices, is impaired in *ten-3* (**i**) and *ten-4* (**j**) plants. The number of turns to each side of  
 152 the perversion point (shown in white font) indicates the degree of coiling. Arrows indicate the  
 153 perversion of coiled tendrils. The *ten-3* and *ten-4* displayed a substantial reduction in helical  
 154 turns on both sides of the perversion points. Scale bars, 2 cm.  
 155



156        Although tendril morphology was largely unaffected in *ten-3* and *ten-4* plants,  
157        their climbing capacity was significantly altered (Fig. 1h-j and Movie. 1). Wild-type  
158        tendrils form approximately 10 helical turns on each side of a perversion point<sup>37</sup> (Fig.  
159        1h and Movie. 1). Although these mutant tendrils could still attach to a support, the free  
160        coiling, formed by two oppositely-handed helices, was impaired, resulting in a reduced  
161        number of helical turns on both sides of the perversion point (Fig. 1i-j and Movie.1).  
162        These results demonstrate that TEN controls tendril identity and climbing ability, and  
163        that both the N- and C-terminus are critical for its function.

164        **TEN C-terminus binds at intragenic regions of target genes.** To understand how the  
165        N- and C-termini of TEN affect TF functions, we first assessed its global binding  
166        profiles by chromatin immunoprecipitation sequencing (ChIP-seq). To this end,  
167        polyclonal antibodies were raised, and antibody specificity was confirmed  
168        (Supplementary Fig. 2a-c and Supplementary Table 1). We also performed immunoblot  
169        assays and confirmed that this antibody recognized recombinant full length TEN, but  
170        not its TCP domain (Supplementary Fig. 2d). This finding excludes the possibility that  
171        this antibody selects against TEN proteins which bind to the DNA via their bHLH  
172        domain. ChIP-seq assays were performed using tendrils at the coiling stage. Two  
173        replicate experiments were performed and shared a large number of peaks covering  
174        more than 59% of peaks in the smaller replicate (Fig. 2a and Supplementary Table 2).  
175        Follow-up analysis of genome distribution, using the overlapping peaks, revealed that  
176        these TEN-binding sites were highly enriched in intragenic regions (1257 peaks), which  
177        accounted for ~74% of all peaks (65.4% in coding and 8.3% in intronic regions) (Fig.  
178        2b-c). In addition to intragenic regions, a minor portion of the binding sites was  
179        distributed in intergenic regions (15.3%), with only 6.1% in promoter regions located  
180        within 5 kb upstream of the transcription start site.

181        To investigate the regulatory spectrum of TEN, a total of 637 genes associated  
182        with 1707 peaks were identified, most of which (474 genes; 74.4%) are intragenic  
183        targets, with only 7.2% (46 genes) being putatively regulating in promoter regions  
184        (Supplementary Table 3). Therefore, in this study, the 474 genes associated with 1257  
185        intragenic binding sites were designated as the TEN target gene set (Supplementary Fig.  
186        2e and Supplementary Table 4). Gene ontology analysis indicated that some genes,  
187        involved in axillary bud formation, such as the *SPL* TF genes<sup>38</sup> and homeobox-related



188 TF genes<sup>39</sup>, were also present in the target gene set, consistent with the role of TEN in  
 189 tendrill morphology regulation (Supplementary Table 4). Genes involved in ethylene  
 190 biosynthesis and signal transduction were significantly enriched ( $P < 0.05$ )  
 191 (Supplementary Fig. 2f). Exogenous spraying with ethephon, a plant growth regulator  
 192 that is converted to ethylene in the plant, induced spontaneous tendrill coiling  
 193 (Supplementary Fig. 2g), consistent with a central role for ethylene in tendrill coiling<sup>40</sup>.

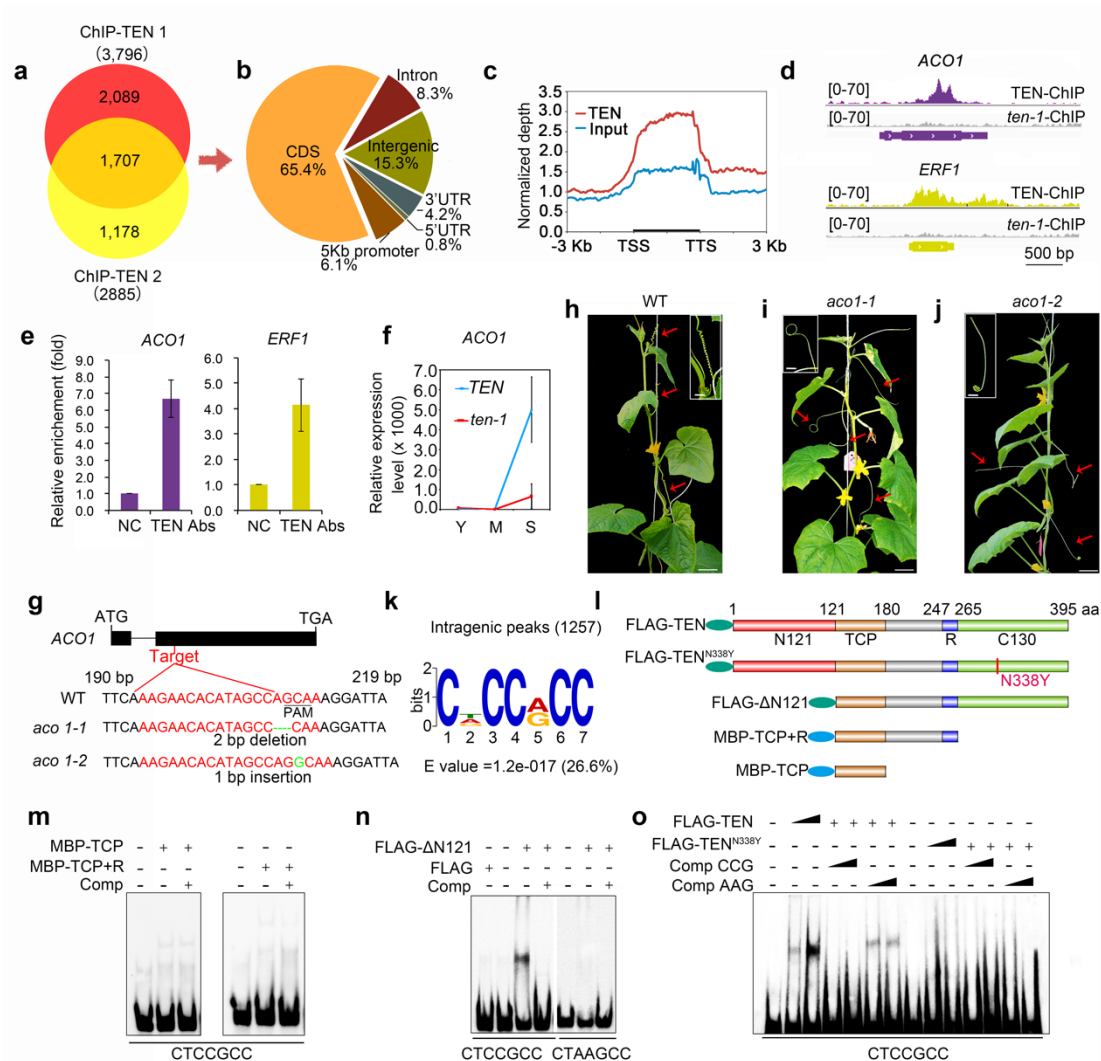

194  
 195 **Figure 2 | TEN is a novel TF with intragenic binding capacity.** **a**, Overlap of TEN binding  
 196 sites in two TEN ChIP-seq replicates. **b**, Distribution of overlapped TEN binding peaks in the  
 197 cucumber genome. **c**, TEN binding peaks are highly enriched in the intragenic regions of coiling  
 198 tendrills. TSS and TTS, transcription start and termination sites. **d**, Two examples of TEN  
 199 binding profiles in the gene bodies of *ACO1* and *ERF1*. **e**, qPCR analysis of TEN recruitment  
 200 to the indicated intragenic region (mean  $\pm$  SEM,  $n = 3$ ). NC, negative control. **f**, Relative mRNA  
 201 expression levels of *ACO1* during tendrill growth detected by RT-qPCR (mean  $\pm$  SEM,  $n = 3$ ).  
 202 Y, young; M, medium; S, stretch. **g**, Identification of the *aco1-1* and *aco1-2* alleles as two  
 203 independent null mutations. Red font highlights sgRNA targets, and underline indicates  
 204 protospacer-adjacent motif (PAM) sequence. **h-j**, Compared to wild type (WT) (**h**), the tendrills

205 in *aco-1* (i) and *aco-2* (j) form irregular coiling and could not attach to their supports. Arrows  
206 indicate the coiled tendrils and insets illustrate the differences in coiling between WT and  
207 mutants. Scale bar, 5 cm. **k**, The enriched motif CDCCRCC. **l**, Schematics of WT TEN, the  
208 N338Y mutant and three truncated proteins. **m**, EMSA showing that TCP and TCP+R do not  
209 bind to a DNA probe containing the CTCCGCC motif. **n**, FLAG-ΔN specifically binds to DNA  
210 containing the CTCCGCC motif. **o**, FLAG-TEN specifically binds to DNA containing the  
211 CTCCGCC motif, but FLAG-TEN<sup>N338Y</sup> does not. Comp CCG, competitor (unlabeled  
212 CTCCGCC probe); Comp AAG, mutant competitor (unlabeled CTAAGCC probe); +/-,  
213 presence/absence of protein or competitor; closed triangle, increasing amount of protein (1 or  
214 4 μg) or competitor (100- or 1000-times that of labeled probe).

215

216 Next, we focused on two exemplary target loci, *ACO1* (*Csa6G160180*), encoding  
217 a 1-aminocyclopropane-1-carboxylate-oxidase enzyme for ethylene synthesis, and  
218 *ERF1* (*Csa7G049230*), encoding an ethylene response factor (Fig. 2d). As revealed by  
219 ChIP-quantitative polymerase chain reaction (ChIP-qPCR), TEN was recruited to the  
220 exons of both *ACO1* and *ERF1* (Fig. 2e). To provide further genetic evidence that these  
221 intragenic targets are genes directly regulated by TEN, we selected the *ACO1* gene for  
222 in-depth investigation. *ACO1* is preferentially expressed in tendril tissue  
223 (Supplementary Fig. 2h), and its pattern during tendril growth showed that it was  
224 upregulated more than 4,000-fold, from the young stage to stretch stage. By contrast,  
225 the activation of *ACO1* was repressed, significantly, in the *ten-1* mutant (Fig. 2f),  
226 suggesting an important role for *ACO1* in the tendril coiling process. We also found  
227 that, from the young stage to stretch stage, although the expression levels of *TEN* were  
228 only slightly up-regulated, the TEN's binding levels on the *ACO1* locus were  
229 significantly up-regulated by approx. 4-fold; this pattern is correlated with the  
230 expression pattern of *ACO1* (Supplementary Fig. 2i).

231 To further explore the function of *ACO1*, CRISPR-Cas9 was employed to target  
232 the *ACO1* N-terminus, and we identified two null-mutants, *aco1-1* and *aco1-2* (Fig. 2g).  
233 We observed that although tendril morphology was largely unaffected in *aco1-1* and  
234 *aco1-2* plants, their climbing capacity was altered significantly (Fig. 2h-j and Movie 2).  
235 Wild-type tendrils could attach to the climbing supports and showed normal free coiling  
236 activity (Fig. 2h and Movie 2); however, these mutant tendrils displayed irregular  
237 coiling and could not attach to their supports (Fig. 2i-j and Movie 2). These results  
238 demonstrated that *ACO1* is an authentic direct target of TEN, providing genetic  
239 evidence that TEN directly regulates its intragenic targets.

240 To further analyze the summits of intragenic peaks, we identified a statistically  
241 overrepresented motif, CDCCRCC (Fig. 2k and Supplementary Fig. 2j). We expressed  
242 and purified a series of truncated TEN proteins, using Sf9 insect cells, to investigate  
243 TEN binding activity on this motif (Fig. 2l and Supplementary Fig. 2k-m).  
244 Electrophoretic mobility-shift assays (EMSAs) and Surface plasmon resonance (SPR)  
245 established that the TCP and R domains bind the previously described TCP binding  
246 motif GGTCCC, with high affinity, but had no significant affinity for a 50 bp probe  
247 containing the CTCCGCC motif (Fig. 2m and Supplementary Fig. 3a-d). However,  
248 purified  $\Delta$ N121 (containing the TCP+R+C130 domains) and full length TEN protein  
249 bound to the DNA fragment containing this newly identified CTCCGCC motif,  
250 supporting an essential role of the C130 region (amino acids 265 to 395 in the C-  
251 terminus) in the sequence-specific DNA binding of TEN (Fig. 2n and Supplementary  
252 Fig. 3e-g).

253 Our EMSA assays performed with full length TEN established that it binds both  
254 the previous GGTCCC motif and the new CTCCGCC motif; however, the  $K_d$  is lower  
255 for the new motif, reflecting stronger binding to this new motif (Supplementary Fig. 3f-  
256 g). In addition, we also showed that the TEN protein could bind, specifically, to the  
257 CTCCGCC motif, which could not be competed with the GGTCCC probe  
258 (Supplementary Fig. 3h). Furthermore, although the N338Y mutation, in the C-  
259 terminus of TEN, had no effect on TEN's binding to GGTCCC motif (Supplementary  
260 Fig. 3i), abolished its binding to this CTCCGCC motif (Fig. 2o), which coincided with  
261 the phenotypic changes induced by the N338Y mutation in *ten-1*<sup>36</sup>. Lastly, we  
262 established that the purified MBP-C protein could not bind to CTCCGCC probes,  
263 indicating that, despite the essential role of the TEN's C-terminus, in binding the  
264 CTCCGCC motif, the C-terminus alone is not sufficient for this binding capacity  
265 (Supplementary Fig. 3j-k). These findings provided strong support for the notion that  
266 TEN is a TF with intragenic binding capacity.

267  
268 **TEN binding site is a novel intragenic enhancer for host gene activation.** To explore  
269 the role of TEN in regulating expression of intragenic target genes, the transcriptomes  
270 of candidate genes were analyzed in wild-type (WT) versus *ten-1* mutant plants. Among  
271 these 474 genes, 132 were downregulated significantly in mutant tendrils (>1.5-fold

272 change;  $P < 0.05$ ); interestingly, no gene was upregulated significantly in the mutant  
273 ( $< 0.67$ -fold change;  $P < 0.05$ ; Supplementary Table 4). This result suggests that the  
274 intragenic binding sites (CDCCRCC) of TEN appear to have an enhancer activity for  
275 its host genes.

276 To explore whether the binding of TEN, to the potential intragenic enhancer  
277 (CDCCRCC), can regulate the neighboring genes, we investigated the expression of  
278 genes flanking the TEN intragenic targets (three genes upstream and downstream) in  
279 WT and the *ten-1* mutant. These experiments showed that TEN activation occurred  
280 predominantly on its specific target genes (Fig. 3a). To validate these data, qRT-PCR  
281 was performed on two exemplary targets, *ACO1* and *ERF1*, and their flanking genes,  
282 in tendrils of WT, *ten-1*, *ten-2* and *ten-3* plants. Our results showed that dysfunction of  
283 TEN, in these mutants, leads to a significant reduction in both *ACO1* and *ERF1*  
284 expression (Fig. 3b and Supplementary Fig. 4a), whereas there was no significant  
285 effects on the expression of the flanking genes, placed either upstream or downstream  
286 of the *ACO1* and *ERF1* loci (Fig. 3b and Supplementary Fig. 4a).

287 To demonstrate, *in vivo*, that the intragenic regulatory elements, bound by TEN,  
288 are a novel type of enhancer sequences, and to test whether the CDCCRCC motifs are  
289 required for the observed enhancer activity, reporter transgenic lines were assays<sup>41</sup>. To  
290 this end, we selected *ACO1* full length genomic DNA sequence, as an enhancer  
291 candidate, and each construct contained an expression cassette with TEN, or a  
292 hygromycin (*Hyg*) gene under the control of the CaMV 35S promoter, and another  
293 expression cassette containing the enhancer candidate (or mutant enhancer in which we  
294 disrupted the respective motifs by point mutations), minimal promoter and luciferase  
295 (*LUC*) reporter gene (Fig. 3c and Supplementary Fig. 4b). All four constructs were  
296 integrated, independently, into the cucumber genome. Importantly, construct B (TEN  
297 + enhancer) exhibited 20-fold higher LUC activity than construct A, the negative  
298 control (*Hyg* + enhancer), and moreover, the construct D (TEN + mutated enhancer)  
299 had strongly reduced LUC activity, compared to construct B (TEN + enhancer) (Fig.  
300 3d).

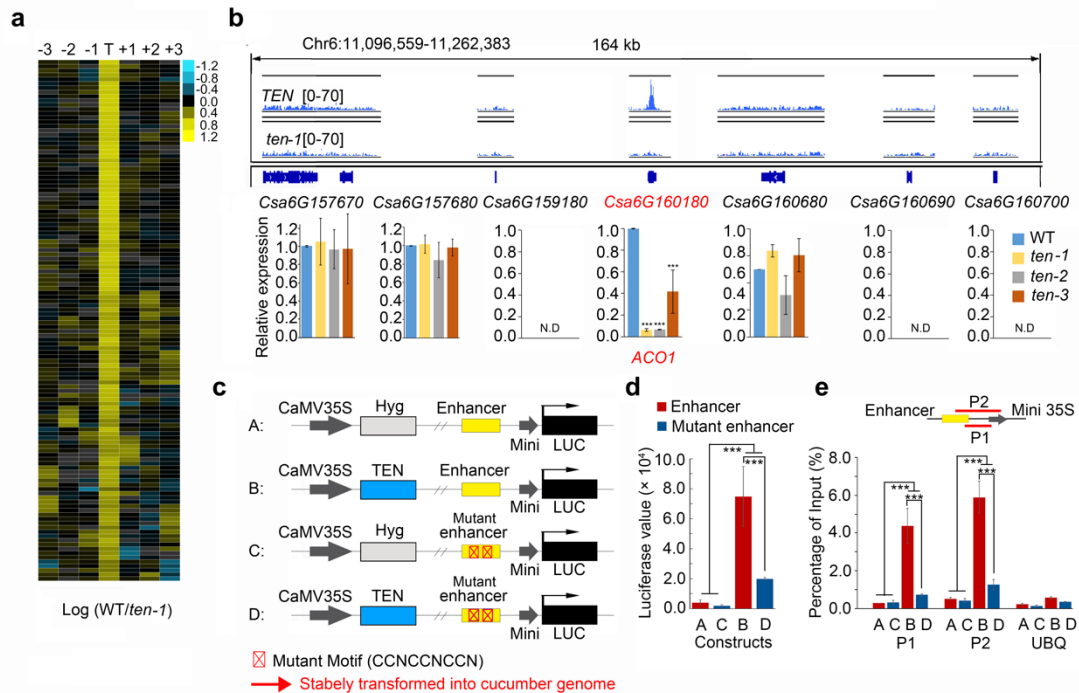

301

302

303 **Figure 3 | TEN binds to intragenic enhancers of its target genes.** **a**, Expression ratio of 132

304 direct upregulated genes of TEN, between WT and *ten-1*, showing TEN regulates

305 predominantly its host genes. T, intragenic target genes; -1 -2 -3, three genes locating upstream

306 of target gene; +1 +2 +3, three genes locating downstream of target gene. **b**, Expression of

307 putative enhancer target gene, *ACO1*, and flanking genes, assayed by RT-qPCR (mean  $\pm$  SEM,

308  $n = 3$ ). *UBQ* was used as internal control. N.D., not detected. **c**, Schematic showing the

309 construction strategy for *in vivo* enhancer validation, through reporter transgenic lines. **d**, LUC

310 activity of positive transgenic cucumber leaves (mean  $\pm$  SEM,  $n = 4$ ). Four independent

311 transgenic plants, per construct, were used for detection. **e**, ChIP-qPCR analysis of TEN

312 recruitment to the indicated regions (P1 and P2) of the intragenic enhancer (mean  $\pm$  SEM,  $n =$

313 3). *UBQ* was used as internal control.

314

315 To further confirm that the transformed TEN protein regulates the intragenic

316 enhancer activity, through binding directly and specifically to the intragenic enhancer,

317 we investigated the binding capacity, by ChIP-qPCR, using leaves from plants

318 expressing one of the stably integrated constructs. Here, we demonstrated that TEN

319 could bind the intragenic enhancer, *in vivo*, and that mutation in the CTCCNCCN motif

320 largely impaired this TEN-binding capacity (Fig. 3e). These findings demonstrate that

321 TEN binds on a novel type of intragenic enhancer, and further, validate the functional

322 importance of the CDCCRCC motifs in the enhancer.

323

324 **TEN is a new, non-canonical HAT.** Having demonstrated that TEN binds to intragenic

enhancers of host genes, via its C-terminus, we next explored the functional role of its

N-terminus. PSI-BLAST (Position-Specific Iterative Basic Local Alignment Search

325 Tool) analysis revealed that the N121 shares a modest similarity with the transferase  
326 domain of an *Arabidopsis* HXXXD acyltransferase (At1G03940; 26% identity,  
327 Supplementary Fig. 5a). Considering that the intragenic enhancer-binding TFs might  
328 participate in shaping chromatin structure<sup>42</sup>, we speculated that TEN has HAT activity.

329 To assess this notion, we tested the activity of recombinant TEN protein and  
330 determined that it acetylated all four core histones, when histone H3 or free core  
331 histones were used as substrates (Fig. 4a). Histone tetramers or octamers enhanced the  
332 acetylation ability of TEN, which occurred predominantly in histone H3 (Fig. 4a). TEN  
333 also efficiently acetylated mononucleosomes assembled on the 208 bp 5S rDNA, with  
334 a preference for nucleosomal histone H3 (Fig. 4b).

335 In order to identify the intrinsic HAT domain in TEN, we performed HAT activity  
336 assays using recombinant TEN, TEN<sup>N338Y</sup>, N121 and  $\Delta$ N121 (Supplementary Fig. 5b).  
337 The first three forms acetylated histone H3 within H3-H4 tetramers, whereas  $\Delta$ N121  
338 had no detectable HAT activity (Fig. 4c). The TEN acetylation site specificity was next  
339 assessed, by quantitative mass spectrometry<sup>43</sup>, to measure the acetylation levels of  
340 individual lysine residues on histones, using the recombinant N121 protein expressed  
341 in and purified from *Escherichia coli*. Our *in vitro* assays indicated that N121 acetylated  
342 K23 and K36, in the tail domain of histone H3, as well as K56, K79 and K122 in its  
343 globular domain, with a preference for K56, K79 and K122 (Fig. 4d and Supplementary  
344 Fig. 5c-e).

345 To confirm these LC-MS/MS results, we performed a combination of *in vitro* HAT  
346 assays and immunoblotting, with antibodies specific for different acetylated sites.  
347 These assays confirmed that full-length TEN and N121 both acetylated the identified  
348 lysines of histone H3, with a preference for H3K56 and K122 (Fig. 4e-f and  
349 Supplementary Fig. 5f-g). In addition, the TEN *in vivo* acetylation patterns of H3 lysine  
350 residues were assessed by transient expression of exogenous TEN in *Nicotiana*  
351 *tabacum* leaves; here, we observed an increase in acetylation of H3K56 and H3K122  
352 (Fig. 4g and Supplementary Fig. 5h). Furthermore, TEN overexpression led to a  
353 significant increase in nuclear H3K56ac and H3K122ac levels, as revealed by  
354 immunolabeling of *N. tabacum*, indicating that TEN acetylates, *in vivo*, chromatin-  
355 bound H3K56 and K122 (Supplementary Fig. 5i-j). Collectively, these *in vitro* and *in*



356 *in vivo* assays established that the N121 contains the intrinsic HAT domain of TEN, with  
357 preferential acetylation of H3K56 and K122 within nucleosomes.

358 The N121 shares no sequence homology with any other known HAT. To further  
359 study its enzymatic mechanism, we therefore focused on some specific amino acid  
360 residues, including glutamine (Gln<sup>14</sup>), aspartate (Asp<sup>55</sup>), serine (Ser<sup>91</sup>) and cysteine  
361 (Cys<sup>104</sup>) that generally form part of the catalytic center. Point mutations of these  
362 candidate residues (Q14N, D55N, S91A and C104A) (Fig. 4h and Supplementary Fig.  
363 6) were tested, using *in vitro* HAT assays, to assess their effects on H3 K56 acetylation.  
364 All mutations showed a varying degree of reduction in HAT activity. In particular, the  
365 C104A mutant protein had almost no ability to acetylate H3K56 (Fig. 4h-i). These  
366 findings demonstrate that C104 is essential for HAT activity, while D55, Q14 and S91  
367 also contribute to HAT activity. The critical role of Asp<sup>55</sup> for this N121 HAT activity  
368 suggested a biochemical basis underlying the phenotypic changes induced by the Asp<sup>55</sup>  
369 deletion in the *ten-3* and *ten-4* mutants.

370 To gain biochemical evidence that N121 is a *bona fide* HAT, we next conducted  
371 steady-state kinetics of H3K56 and K122 acetylation<sup>43</sup>. Here, acetylation of both  
372 H3K56 and K122 showed saturation kinetics (Fig. 4j-k). The lower  $K_m$  for H3K56ac  
373 indicated a higher affinity of N121 for H3K56, whereas the catalytic efficiency of  
374 H3K56ac was ~60% of that for H3K122ac (Fig. 4l). We compared the acetylation  
375 kinetics of N121 and Rtt109, a HAT required for H3K56 acetylation in yeast. Based on  
376 a previous study, we established that both N121 and Rtt109 exhibited similar levels of  
377 activity on the H3-H4 tetramer<sup>44</sup> (Fig. 4l).

378 We also directly compared the HAT activity of N121 with a canonical HAT P300,  
379 by quantitative mass spectrometry. These results showed that N121 acts preferentially  
380 on lysine 56 and 122 of histone H3 (Fig. 4m and Supplementary Fig. 7a). The HAT  
381 activity of the TEN-N121 on H3K56 and H3K122 was approx. seven times less than  
382 that of the canonical HAT P300 (Fig. 4m and Supplementary Fig. 7a).

383 Taken together, these findings demonstrate that the N121 domain of TEN is a  
384 novel histone acetyltransferase which functions, preferentially, at the globular domain  
385 of histone H3 within the nucleosome.



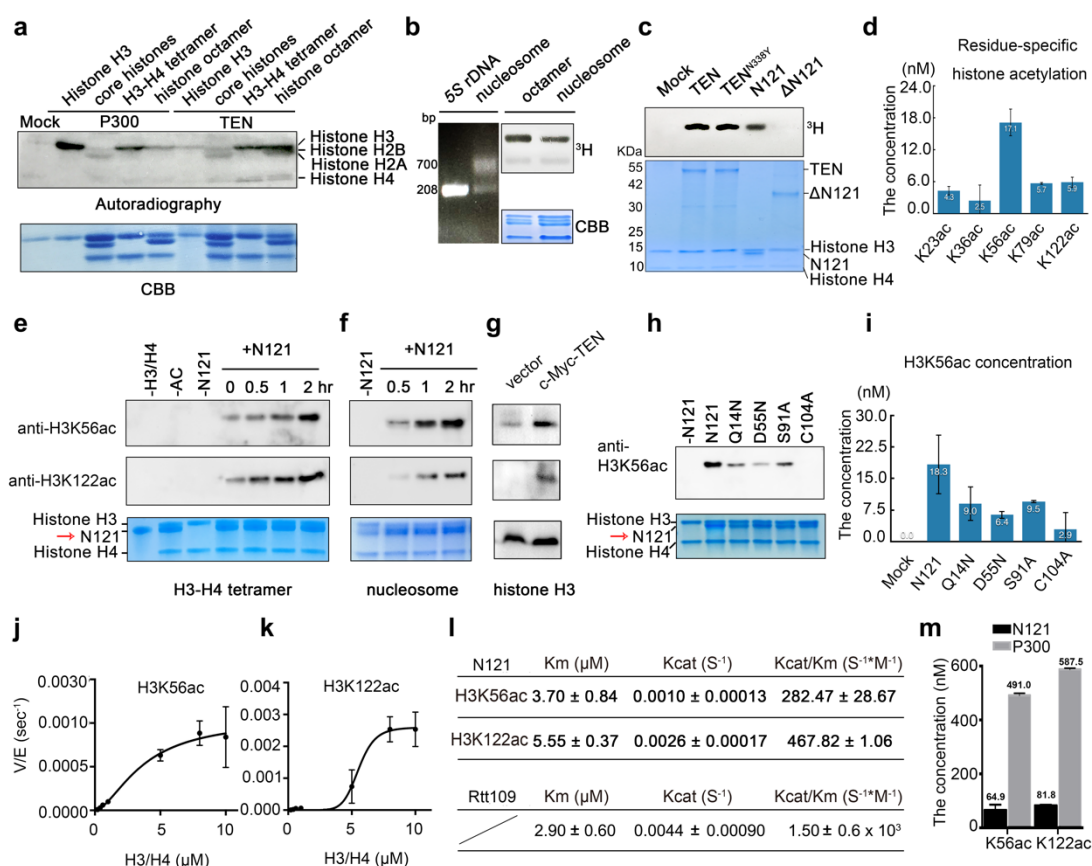

386

387

388 **Figure 4 | TEN is a novel histone acetyltransferase (HAT).** **a**, HAT assays with radiolabeled

389 acetyl CoA and recombinant P300, FLAG-TEN or mock (control). CBB, Coomassie brilliant

390 blue. **b**, Mononucleosomes (~700 bp) assembled on 5S rDNA (208 bp), visualized in ethidium

391 bromide-stained gels (left), subjected to HAT assays with recombinant FLAG-TEN with <sup>3</sup>H-

392 labeled acetyl CoA and visualized by autoradiography or CBB staining (right). **c**, HAT assays

393 with radiolabeled acetyl CoA and FLAG-TEN, FLAG-TEN<sup>N338Y</sup>, FLAG-N121 and FLAG-

394 ΔN121 or mock (control). **d**, Quantification of acetylation levels of individual lysines on

395 histone H3 after the HAT assay using the recombinant N121 protein expressed in and purified

396 from *E. coli*, based on mass spectrometry (mean ± SEM, n=3). **e** and **f**, Acetylation of H3K56

397 and K122 within the H3-H4 tetramer (**e**) and nucleosome (**f**) by N121 purified from *E. coli*,

398 determined by immunoblotting analysis. **g**, Overexpression of c-Myc-TEN in tobacco leaves

399 increased the acetylation levels of H3K56 and H3K122. **h** and **i**, N121 mutant proteins purified

400 from *E. coli* showed loss of acetylation on H3K56. **j** to **l**, Steady-state kinetics of HAT activity

401 of N121 purified from *E. coli* on H3K56 (**j**) and H3K122 (**k**) (n = 3). Derived kinetic parameters

402 for K<sub>m</sub> and K<sub>cat</sub> are shown, as compared with Rtt109<sup>42</sup> (**l**). **m**, A direct comparison between

403 N121 HAT activity and that of a canonical HAT P300, by quantitative mass spectrometry. HAT

404 assays with 600 μM acetyl CoA, 0.2 μM N121/P300, and 2.0 μM H3-H4 tetramer at 30°C for

405 3 hr. The y-axis indicates the calculated concentration of acetylation at specific lysine residues.

406

407 **In vivo evidence that TEN facilitates chromatin accessibility.** To further probe the

408 relationship between TEN binding and acetylation of H3K56 and H3K122, *in vivo*, we

409 mapped H3K56ac and H3K122ac levels, genome-wide, by ChIP-seq and compared the

410 results to the distribution of TEN binding sites of tendrils tissue at the coiling stage. The

411

412

413

414

415

416

417

418

419

420

410 vast majority (>99%) of H3K56ac and H3K122ac peaks overlapped (Fig. 5a). The  
411 intragenic binding sites of TEN were colocalized predominantly with the H3K56ac  
412 (1,073 out of 1,257 peaks) and H3K122ac peaks (1,054 out of 1,257 peaks, Fig. 5a). In  
413 addition, we observed that there were 1,043 TEN binding peaks colocalized with both  
414 H3K56ac and H3K122ac peaks (Supplementary Fig. 7b and Supplementary Table 5).  
415 H3K56ac and H3K122ac were observed to more likely occur on exons and introns than  
416 promoters and intergenic regions bound by TEN (Fig. 5b). These results indicate that  
417 the binding of TEN to gene bodies is related to acetylation of the histone H3 globular  
418 domain (Fig. 5b).

419 To assess the *in vivo* effect of the TEN C-terminus on TEN binding and HAT  
420 activities, we next examined the 1043 intragenic TEN binding sites that were enriched  
421 simultaneously for H3K56ac and H3K122ac in WT versus *ten-1* (Fig. 5c-f), as well as  
422 1043 randomly selected H3K56ac and H3K122ac peaks lacking TEN binding as an  
423 internal control (Fig. 5g-j). TEN<sup>N338Y</sup> lost most of its binding peaks in the *ten-1* mutant  
424 (Fig. 5c), consistent with our *in vitro* binding assays (Fig. 2o). This reduction of TEN  
425 binding, in the *ten-1* mutant, was associated with a decrease in H3K56ac levels (Fig.  
426 5d). As H3K56ac and H3K122ac are implicated in the loosening and eviction of  
427 nucleosomes<sup>20,26-28</sup>, we reasoned that TEN may promote chromatin accessibility and,  
428 thereby, stimulate transcription of its target genes.

429 To test this notion, chromatin accessibility was tracked in the tendril genome by  
430 using FAIRE-seq (formaldehyde-assisted isolation of regulatory elements sequencing).  
431 Here, a strong correlation was observed between TEN binding, histone acetylation and  
432 chromatin accessibility (Fig. 5c-e); these functions were impeded dramatically in *ten-1*  
433 compared to WT (Fig. 5e). Importantly, RNA-seq analysis further showed that most  
434 genes that corresponded to the TEN intragenic peaks were downregulated in *ten-1* (Fig.  
435 5f and Supplementary Table 6). By contrast, the internal controls exhibited no  
436 significant difference between WT and *ten-1* (Fig. 5g-j). The genomic view of two  
437 exemplary targets, *ACO1* and *ERF1*, also supported these findings (Supplementary Fig.  
438 7c-d).

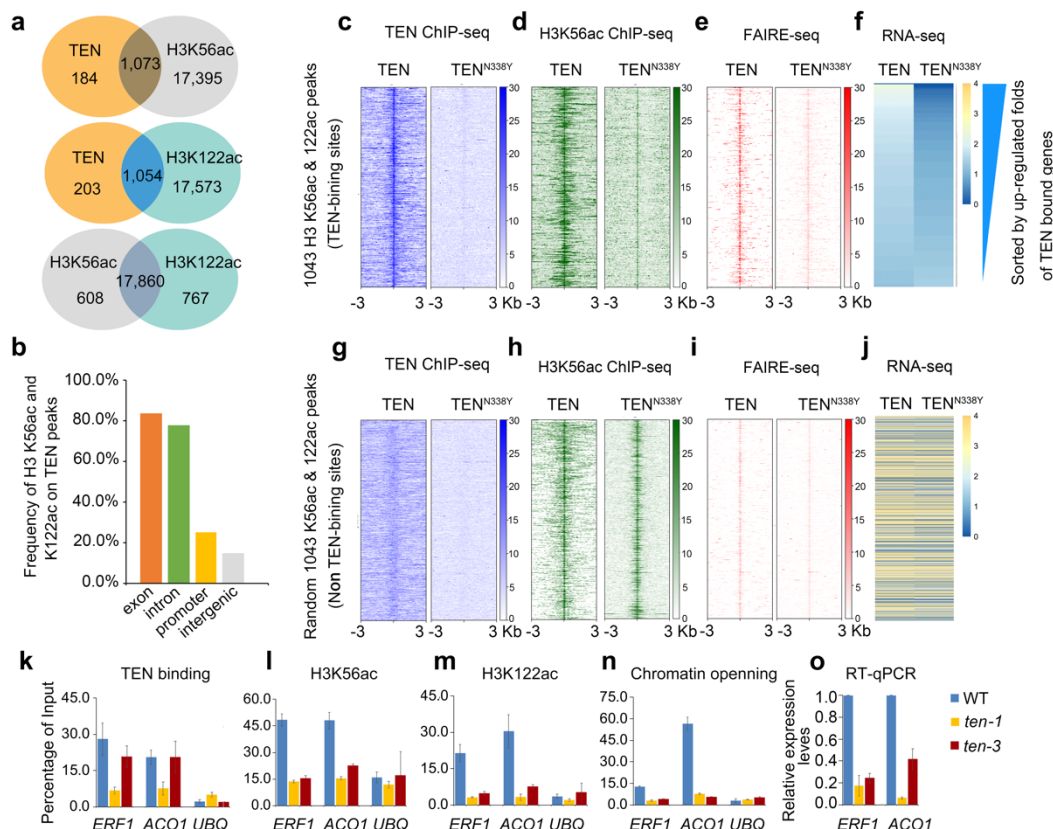

439  
 440 **Figure 5 | TEN promotes chromatin accessibility.** **a**, Metagene analysis showing genome-  
 441 wide colocalization of TEN intragenic peaks with H3K56ac and H3K122ac in tendrils. **b**,  
 442 H3K56ac and H3K122ac are enriched in intragenic regions of TEN peaks, but not in promoter  
 443 or intergenic regions. **c** to **f**, Read density heatmaps showing the intensity of TEN peaks (**c**),  
 444 H3K56ac/H3 signals (**d**), chromatin opening signals (**e**) and RNA-seq signals (**f**) in WT and  
 445 *ten-1* at 1043 overlapped peaks spanning  $\pm 3$  kb from the center of the TEN peaks. Analyzed  
 446 peaks were organized from top to bottom based on downregulation (fold) in *ten-1*. **g** to **i**,  
 447 Read density heatmaps showing the intensity of TEN peaks (**g**), H3K56ac/H3 signals (**h**),  
 448 FAIRE-seq signals (**i**) and RNA-seq signals (**j**) in WT and *ten-1* at 1043 random non-TEN binding  
 449 peaks spanning  $\pm 3$  kb from the center of the H3K56ac peaks. **k** to **o**, Validation of TEN binding,  
 450 histone acetylation, chromatin opening and gene expression. Association of TEN protein with  
 451 *ACO1*, *ERF1* loci and control regions (*UBQ*, *Csa3G778350*). ChIP was performed on WT, *ten-*  
 452 *1* and *ten-3* with a TEN polyclonal antibody (**k**). H3K56ac (**l**) and H3K122ac (**m**) levels at the  
 453 *ACO1*, *ERF1* and *UBQ* loci in WT, *ten-1* and *ten-3*. Chromatin opening detected at *ACO1*,  
 454 *ERF1* and *UBQ* loci in WT, *ten-1* and *ten-3* by FAIRE-qPCR (**n**). Relative mRNA expression  
 455 levels of *ACO1* and *ERF1* genes among WT, *ten-1* and *ten-3* detected by RT-qPCR, *UBQ* was  
 456 used as internal control (mean  $\pm$  SEM,  $n = 3$ ) (**o**).  
 457

458 To survey the *in vivo* effect of the N121 domain on TEN binding, H3K56ac and  
 459 H3K122ac, chromatin accessibility, and target gene expression, ChIP-qPCR, FAIRE-  
 460 qPCR and qRT-PCR were performed at the TEN target genes, *ACO1* and *ERF1*, in WT  
 461 and *ten-3* that has an in-frame deletion of Asp<sup>55</sup> in the N121 domain, using *ten-1* as a  
 462 negative control (Fig. 5k-o). As expected, at their TEN binding regions, both genes

463 showed significant decreases in TEN binding (Fig. 5k), H3K56ac and H3K122ac levels  
464 (Fig. 5l-m, respectively) and FAIRE signals (Fig. 5n), as well as substantially reduced  
465 expression, being about 7-fold for *ERF1* and 17-fold for *ACO1* in the *ten-1* mutant (Fig.  
466 5o).

467 Furthermore, we established that deletion of Asp<sup>55</sup> in *ten-3* did not affect  
468 significantly the TEN binding levels (Fig. 5k). However, H3K56ac and H3K122ac  
469 levels, as well as chromatin accessibility, were significantly reduced (Fig. 5l-n). As  
470 predicted, these two genes were also downregulated by about 5-fold for *ERF1* and 3-  
471 fold for *ACO1* compared to WT (Fig. 5o), consistent with our biochemical result that  
472 Asp<sup>55</sup> contributed largely to the HAT activity of N121 (Fig. 4h-i). These findings  
473 provide strong support for the hypothesis that, in tendrils, TEN binds specifically to its  
474 target intragenic regions, where it acetylates the globular domain of histone H3 to  
475 facilitate chromatin accessibility and, thereby activates its target gene expression.

476 Of equal importantly, combined with the phenotypic changes of tendril induced  
477 by the mutations in both the C- and N-termini, our findings provide *in planta* evidence  
478 that TEN binding, and the associated acetylation of the globular domain of H3, are  
479 critical for normal tendril architecture and behavior.

480 **Conserved HAT function of CYC/TB1 TFs conferred by IDR.** To explore whether  
481 the N terminal regions of CYC/TB1-like proteins have conserved HAT activity, we  
482 performed N-terminal alignments of several CYC/TB1 TFs from among angiosperm  
483 species (Supplementary Fig. 8a), and cucumber TEN, durio CYC, Arabidopsis  
484 BRC1 and BRC2, and maize TB1 were selected for further analysis. All these N-  
485 terminal regions contain a large portion of IDRs (Fig. 6a and Supplementary Fig. 8b)  
486 and share little sequence homology (Fig. 6b). However, these regions did contain some  
487 amino acids, including glutamine (Gln<sup>14</sup>), aspartate (Asp<sup>55</sup>), and cysteine (Cys<sup>104</sup>) that  
488 are responsible for the catalytic activity of N121 (Figs. 6b and 4h). As IDRs are  
489 generally evolving rapidly, at the primary sequence level, it is currently difficult to  
490 predict whether their functional consequences are preserved during the evolution of  
491 CYC/TB1-like proteins<sup>45</sup>.

492 From the view of this situation, N terminal proteins of DzCYC, AtBRC1 and  
493 AtBRC2 were expressed and purified to test their effects on H3K56 and K122

494 acetylation (Supplementary Fig. 9). Our results showed that each protein acetylated  
495 both K56 and K122 in the histone H3 globular domain (Fig. 6c and Supplementary Fig.  
496 10). Transient expression of ZmTB1 in *Nicotiana tabacum* leaves similarly resulted in  
497 increased H3K56 and H3K122 acetylation (Fig. 6d). These findings support the  
498 hypothesis that such homologous IDRs retain similar functions, despite extensive  
499 sequence divergence<sup>45</sup>.

500 Recent studies showed that ZmTB1 bound to the gene bodies of a target gene,  
501 *Tru1*<sup>7</sup>. The acetylation levels of TB1-binding sites on *Tru1*, in maize tiller buds, were  
502 assessed by ChIP-qPCR, using the primers previously reported (Fig. 6e)<sup>7</sup>. Both  
503 H3K56ac and H3K122ac levels were enriched significantly at the intronic P6 site (Fig.  
504 6f-g), consistent with previous results that TB1 binds to the P6 site with high affinity<sup>7</sup>.  
505 *Teosinte glume architecture1 (Tgal)* is another maize domestication gene that is  
506 downstream of TB1 and upregulated by TB1<sup>46</sup>. By using a TB1 antibody, we  
507 established that, in addition to binding to the known p1 site in the promoter, TB1 could  
508 bind to a DNA element located in the third exon of the *Tgal* locus (Fig. 6h-i).  
509 Furthermore, we showed that both H3K56ac and H3K122ac modifications were  
510 enriched significantly at the TB1 intragenic binding site (Fig. 6j-k). H3K56ac was also  
511 identified to be significantly enriched at the p1 promoter region bound by TB1.  
512 However, although TB1 showed stronger binding at the promoter, the H3K56ac level  
513 was lower than that in the intragenic binding site (Fig. 6i-j). We inferred that this might  
514 be attributable to acetylation at the histone H3 globular domain, such as H3K56ac or  
515 K122ac in coding regions, thereby evading the surveillance of the classic histone  
516 deacetylation pathway<sup>14</sup>. Recent studies indicated that AtBRC1 also bound to the  
517 introns of their targets *HB53* and *HB21*<sup>8</sup>, and activated their expression. Our study  
518 implicates a conserved mechanism for gene activation, by CYC/TB1-like TFs, which  
519 function both as TFs binding at intragenic enhancer sites, and as HATs acting on the  
520 histone globular domain (Supplementary Fig. 11). This discovery provides important  
521 insights into the regulatory mechanism involved in axillary bud development and, thus,  
522 plant architecture.



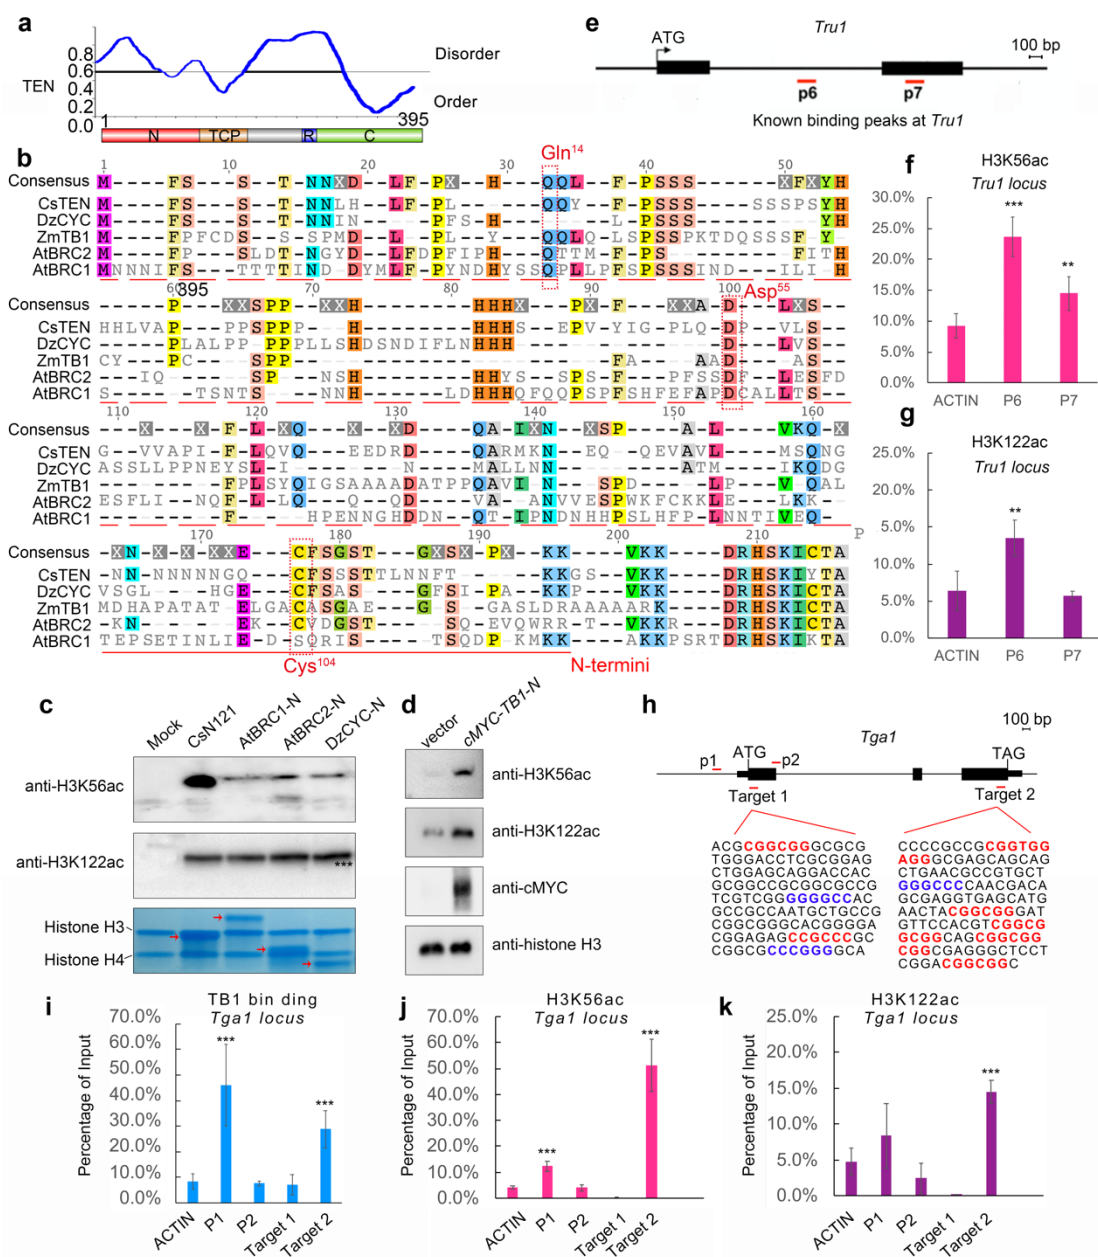

523

524

525 **Figure 6 | The N termini of CYC/TB1-like proteins have conserved HAT activities.** **a**, IDRs

526 of TEN. Graphs plotting intrinsic disorder (PONDR VL3-BA) for TEN protein. PONDR VL3-

527 BA score (y-axis) and amino acid position (x-axis) are shown, indicating the intrinsically

528 disordered and ordered regions. **b**, Alignment of the N-terminus of CYC/TB1-like proteins

529 among four angiosperm species. Red dashed boxes indicate the Gln<sup>14</sup>, Asp<sup>55</sup> and Cys<sup>104</sup> amino

530 acid residues. **c**, Acetylation of H3K56 and K122 within the H3-H4 tetramer by N terminus

531 proteins of TEN, BRC1, BRC2 and durian CYC, determined by immunoblotting analysis. **d**,

532 Overexpression of c-Myc-ZmTB1-N in tobacco leaves increased acetylation levels of H3K56

533 and H3K122. **e** and **f**, H3K56ac (**e**) and H3K122ac (**f**) levels at P6 and P7 sites of *Tru1* locus

534 bound by TB1. **g**, Diagram of the *Tga1* genic region. Black boxes indicate exons, and lines

535 between boxes represent introns. Locations of the amplicons (targets 1 and 2) used for ChIP-

536 qPCR are marked below. Potential TB1-binding motifs are highlighted in blue (GGGCCC) and

537 red (CCNCCN). **h** to **j**, TB1 binding (**h**), H3K56ac (**i**) and H3K122ac (**j**) levels at target 1 and

537 2 sites of *Tga1*. ChIP was performed with antibodies to TB1, H3K56ac and H3K122ac (mean  
538  $\pm$  SEM,  $n = 3$ ). Triple asterisk,  $P < 0.01$ .

## 539 **DISCUSSION**

540 Each genome has undergone a unique evolutionary trajectory, offering a distinct  
541 window to explore a unique range of biological processes. In this study, the cucumber  
542 genome offered a special lens to observe the molecular functions of the CYC/TB1-like  
543 protein family of TFs, to gain molecular insight into how intragenic binding, by a TF,  
544 can regulate gene expression, to explore the function of IDR within TFs.

545 A recent genome-wide ChIP-seq assay reported that TB1 mainly binds to  
546 promoters, and only a few peaks were located within gene body regions<sup>6</sup>. In our study,  
547 TEN predominantly bound to the gene body, and this was not unexpected, given that  
548 these two genes have diverged over a significant period of evolution. In addition, as ~1  
549 mm-long arrested buds were used for TB1 ChIP-seq, whereas tendrils at the coiling  
550 stage were used for TEN ChIP-seq assays in the current study, we cannot preclude the  
551 possibility that TEN may have another binding specificity at the stage of tendril  
552 meristem development. We further compared the regulatory datasets of TB1 and TEN.  
553 Despite the quite different genome-wide binding features, they also exhibited a number  
554 of similar genetic pathways involved in regulating phytohormones and trehalose 6-  
555 phosphate metabolism (Supplementary Fig.12 and Supplementary Table 7).

556 In this study, we discovered three features of TEN; i.e., 1) its function may  
557 primarily be as a transcriptional activator, 2) it can bind intragenic enhancers of target  
558 genes, and 3) it is a novel, non-canonical HAT that acts on the histone globular domain.  
559 TEN, itself, then becomes the link that connects these three activities, and therefore,  
560 provides an answer to the question regarding the mechanism by which the modification  
561 at the H3 globular domain is integrated into the transcriptional process<sup>32</sup>. Tail-based  
562 histone acetylation sites function as platforms for the recruitment of transcriptional  
563 regulators, which usually occurs around transcription start sites. Our study supports the  
564 notion that acetylation of the histone globular domain, in concert with the maintenance  
565 of accessible chromatin, are important facets of transcriptional regulation, via  
566 intragenic enhancers. In view of these findings, we investigated the genomic  
567 distribution of two human enhancer binding TFs, the heat shock factor (HSF-1)<sup>47</sup> and



568 the estrogen receptor alpha (ER $\alpha$ )<sup>20,48</sup>, both of which can interact and recruit CBP/p300.  
569 Importantly, we showed that H3K56ac or H3K122ac modification was observed to  
570 more likely occur on exons than the other regions bound by the HSF-1 or ER $\alpha$   
571 (Supplementary Fig. 13a-b). Utilizing K56ac or K122ac could also be advantageous, as  
572 it can evade the surveillance of the classic histone deacetylation pathway in coding  
573 regions<sup>14</sup>. Thus, our findings add critical information that advances knowledge as to  
574 how the binding of a TF, within the intragenic region of a gene, can influence  
575 expression. The acetylation and loosening of chromatin, at specific intragenic targets,  
576 by TEN, could well act to facilitate productive RNA elongation by RNA polymerase  
577 (supplementary Fig. 11). Besides, it has not escaped our notice that the TEN-dependent  
578 epigenetic regulation, on these intragenic targets, might also direct codon choice and  
579 affect protein evolution<sup>49</sup> during the evolutionary process of tendrils formation.

580 HATs form a diverse collection of enzymes characterized by their sequence  
581 homology and structural features, including the GNAT, MYST and p300/CBP  
582 families<sup>50</sup>. These classical HATs are mainly recruited to target promoters through  
583 physical interactions with sequence-specific TFs<sup>51</sup>, whereas in mammalian systems,  
584 some HATs also possess DNA binding activity<sup>52,53</sup>. In our study, we discovered a non-  
585 canonical type of DNA binding HAT – TEN, in plants, that acetylates the histone H3  
586 globular domain at intragenic enhancers, through its N terminus which harbors a  
587 significant portion of IDRs (Fig. 6a and Supplementary Fig. 8). We also showed that  
588 the kinetic of acetylation capacity of N121, on H3K56 and H3K122, is comparable to  
589 that of Rtt109, and is approx. one-eighth of P300. For Rtt109, studies have  
590 demonstrated that Vps75 greatly enhances its HAT activity<sup>44</sup>, and therefore, the  
591 possibility exists that TEN may similarly have increased HAT activity, *in vivo*, through  
592 its interaction with other proteins, or via posttranslational modifications.

593 Due to the highly diverged primary sequences, the function and evolution of these  
594 IDRs has remained largely unexplored. Our findings, that the intrinsically disordered  
595 N-termini of all tested CYC/TB1-like proteins have conserved HAT activity, now  
596 provide an answer to the frontier question regarding the mechanism of action of TFs  
597 with IDRs<sup>35</sup>. In addition, recently, IDRs were shown to play an important role in the  
598 compartmentalization of the transcription apparatus, and the formation of liquid-liquid  
599 phase separation, related to the nature of super-enhancers<sup>13</sup>. In this regard, our study

600 also offers a possibility to test if the typical intragenic enhancer works by a similar  
601 mechanism.

602

603

## 604 **Acknowledgments**

605 We thank Yihua Huang and John Doebley for comments on the manuscript, Jinsheng  
606 Lai, Kehui Liu, Haiteng Deng, Shilong Fan, Xiling Chen, Lvjun Guo and Yu Zhao for  
607 experimental assistance, and Huai Wang for providing TB1 antibodies. **Funding:** This  
608 work was supported by grants from the National Natural Science Foundation of China  
609 (31530066 to S.H., 31572117 to X.Y.), the National Key R&D Program of China  
610 (2016YFD0101007 and 2016YFD0100500) and the Central Public-Interest Scientific  
611 Institution Basal Research Fund (No. Y2017PT52). Additional support was provided  
612 by the Chinese Academy of Agricultural Science (ASTIP-CAAS and CAAS-  
613 XTCX2016001), the Leading Talents of Guangdong Province Program (00201515 to  
614 S.H.) and the Shenzhen Municipal (The Peacock Plan KQTD2016113010482651) and  
615 the Dapeng district government.

## 616 **Author Contributions**

617 S.H. and X.Y. designed the research. X.Y., Z.Z., and B.W. made major contributions  
618 to biochemical analyses and ChIP assays. J.Y. contributed to protein purification. T.L.,  
619 X.Y. and Z.Z. led bioinformatic analyses. X.Y. and T.X. led genetic transformation of  
620 plants. S.W. helped to collect tendrill materials. G.L., J.Z., and Z.Z. contributed to  
621 histone purification and assembly. S.H., X.Y., G.L., W.J.L., and J.Y. analyzed the data  
622 and wrote the manuscript.

## 623 **Competing Interests statement**

624 The authors declare no competing interests.

## 625 **References**

- 626 1. Martín-Trillo, M. & Cubas, P. TCP genes: a family snapshot ten years later. *Trends*  
627 *Plant Sci.* **15**, 31-39 (2010).
- 628 2. Howarth, D.G. & Donoghue, M.J. Phylogenetic analysis of the “ECE”(CYC/TB1)  
629 clade reveals duplications predating the core eudicots. *Proc. Natl. Acad. Sci. USA*  
630 **103**, 9101-9106 (2006).

- 631 3. Doebley, J., Stec, A. & Hubbard, L. The evolution of apical dominance in maize.  
632 *Nature* **386**, 485-488 (1997).
- 633 4. Takeda, T. *et al.* The OsTB1 gene negatively regulates lateral branching in rice.  
634 *Plant J.* **33**, 513-520 (2003).
- 635 5. Aguilar-Martínez, J.A., Poza-Carrión, C. & Cubas, P. Arabidopsis BRANCHED1  
636 acts as an integrator of branching signals within axillary buds. *Plant Cell* **19**, 458-  
637 472 (2007).
- 638 6. Dong, Z. *et al.* The regulatory landscape of a core maize domestication module  
639 controlling bud dormancy and growth repression. *Nature comm.* **10**, 1-15 (2019).
- 640 7. Dong, Z. *et al.* Ideal crop plant architecture is mediated by tassels replace upper  
641 ears1, a BTB/POZ ankyrin repeat gene directly targeted by TEOSINTE  
642 BRANCHED1. *Proc. Natl. Acad. Sci. USA* **114**, 8656-8664 (2017).
- 643 8. González-Grandío, E. *et al.* Abscisic acid signaling is controlled by a  
644 BRANCHED1/HD-ZIP I cascade in Arabidopsis axillary buds. *Proc. Natl. Acad.*  
645 *Sci. USA* **114**, 245-254 (2017).
- 646 9. Blackwood, E.M. & Kadonaga, J.T. Going the distance: a current view of enhancer  
647 action. *Science* **281**, 60-63 (1998).
- 648 10. Kvon, E.Z. *et al.* Genome-scale functional characterization of Drosophila  
649 developmental enhancers in vivo. *Nature* **512**, 91-95 (2014).
- 650 11. Gillies, S.D., Morrison, S.L., Oi, V.T. & Tonegawa, S. A tissue-specific  
651 transcription enhancer element is located in the major intron of a rearranged  
652 immunoglobulin heavy chain gene. *Cell* **33**, 717-728 (1983).
- 653 12. Hebbes, T., Clayton, A., Thorne, A. & Crane-Robinson, C. Core histone  
654 hyperacetylation co-maps with generalized DNase I sensitivity in the chicken beta-  
655 globin chromosomal domain. *EMBO J.* **13**, 1823-1830 (1994).
- 656 13. Hahn, S. Phase Separation, Protein Disorder, and Enhancer Function. *Cell* **175**,  
657 1723-1725 (2018).
- 658 14. Li, B., Carey, M. & Workman, J.L. The role of chromatin during transcription. *Cell*  
659 **128**, 707-719 (2007).
- 660 15. Liu, C., Lu, F., Cui, X. & Cao, X. Histone methylation in higher plants. *Annu. Rev.*

- 661 *Plant Biol.* **61**, 395-420 (2010).
- 662 16. Rajagopalan, M., Balasubramanian, S., Ioshikhes, I. & Ramaswamy, A. Structural  
663 dynamics of nucleosome mediated by acetylations at H3K56 and H3K115, 122.  
664 *Eur. Biophys. J.* **46**, 471-484 (2017).
- 665 17. Suzuki, Y., Horikoshi, N., Kato, D. & Kurumizaka, H. Crystal structure of the  
666 nucleosome containing histone H3 with crotonylated lysine 122. *Biochem.*  
667 *Biophys. Res. Comm.* **469**, 483-489 (2016).
- 668 18. Tessarz, P. & Kouzarides, T. Histone core modifications regulating nucleosome  
669 structure and dynamics. *Nat. Rev. Mol. Cell Biol.* **15**, 703 (2014).
- 670 19. Rufiange, A., Jacques, P.-E., Bhat, W., Robert, F. & Nourani, A. Genome-wide  
671 replication-independent histone H3 exchange occurs predominantly at promoters  
672 and implicates H3 K56 acetylation and Asf1. *Mol. Cell* **27**, 393-405 (2007).
- 673 20. Tropberger, P. *et al.* Regulation of transcription through acetylation of H3K122 on  
674 the lateral surface of the histone octamer. *Cell* **152**, 859-872 (2013).
- 675 21. Williams, S.K., Truong, D. & Tyler, J.K. Acetylation in the globular core of histone  
676 H3 on lysine-56 promotes chromatin disassembly during transcriptional activation.  
677 *Proc. Natl. Acad. Sci. USA* **105**, 9000-9005 (2008).
- 678 22. Chen, C.-C. *et al.* Acetylated lysine 56 on histone H3 drives chromatin assembly  
679 after repair and signals for the completion of repair. *Cell* **134**, 231-243 (2008).
- 680 23. Driscoll, R., Hudson, A. & Jackson, S.P. Yeast Rtt109 promotes genome stability  
681 by acetylating histone H3 on lysine 56. *Science* **315**, 649-652 (2007).
- 682 24. Han, J. *et al.* Rtt109 acetylates histone H3 lysine 56 and functions in DNA  
683 replication. *Science* **315**, 653-655 (2007).
- 684 25. Zhang, L. *et al.* Multisite substrate recognition in Asf1-dependent acetylation of  
685 histone H3 K56 by Rtt109. *Cell* **174**, 818-830 (2018).
- 686 26. Neumann, H. *et al.* A method for genetically installing site-specific acetylation in  
687 recombinant histones defines the effects of H3 K56 acetylation. *Mol. Cell* **36**, 153-  
688 163 (2009).
- 689 27. Watanabe, S. *et al.* Structural characterization of H3K56Q nucleosomes and  
690 nucleosomal arrays. *Biochim. Biophys. Acta Gene Regul. Mech.* **1799**, 480-486

- 691 (2010).
- 692 28. Schwabish, M.A. & Struhl, K. Asf1 mediates histone eviction and deposition  
693 during elongation by RNA polymerase II. *Mol. Cell* **22**, 415-422 (2006).
- 694 29. Värnv, S. *et al.* Acetylation of H3 K56 is required for RNA polymerase II transcript  
695 elongation through heterochromatin in yeast. *Mol. Cell. Biol.* **30**, 1467-1477  
696 (2010).
- 697 30. Das, C., Lucia, M.S., Hansen, K.C. & Tyler, J.K. CBP/p300-mediated acetylation  
698 of histone H3 on lysine 56. *Nature* **459**, 113-117 (2009).
- 699 31. Pradeepa, M.M. *et al.* Histone H3 globular domain acetylation identifies a new  
700 class of enhancers. *Nat. Genet.* **48**, 681-686 (2016).
- 701 32. Venkatesh, S. & Workman, J.L. Histone exchange, chromatin structure and the  
702 regulation of transcription. *Nat. Rev. Mol. Cell Biol.* **16**, 178-189 (2015).
- 703 33. Tompa, P. Intrinsically disordered proteins: a 10-year recap. *Trends Biochem. Sci.*  
704 **37**, 509-516 (2012).
- 705 34. Wright, P.E. & Dyson, H.J. Intrinsically disordered proteins in cellular signalling  
706 and regulation. *Nat. Rev. Mol. Cell Biol.* **16**, 18-29 (2015).
- 707 35. Roeder, R.G. 50+ years of eukaryotic transcription: an expanding universe of  
708 factors and mechanisms. *Nat. Struct. Mol. Biol.* **26**, 1-9 (2019).
- 709 36. Wang, S. *et al.* A rare SNP identified a TCP transcription factor essential for tendril  
710 development in cucumber. *Mol. Plant* **8**, 1795-1808 (2015).
- 711 37. Gerbode, S.J., Puzey, J.R., McCormick, A.G. & Mahadevan, L. How the cucumber  
712 tendril coils and overwinds. *Science* **337**, 1087-1091 (2012).
- 713 38. Wang, Y. & Li, J. Branching in rice. *Curr. Opin. Plant Biol.* **14**, 94-99 (2011).
- 714 39. Vroemen, C.W., Mordhorst, A.P., Albrecht, C., Kwaaitaal, M.A. & de Vries, S.C.  
715 The CUP-SHAPED COTYLEDON3 gene is required for boundary and shoot  
716 meristem formation in Arabidopsis. *Plant Cell* **15**, 1563-1577 (2003).
- 717 40. Jaffe, M.J. Ethylene and other plant hormones in thigmomorphogenesis and tendril  
718 thigmonasty. in *Hormonal Regulation of Plant Growth and Development*, pp 353-  
719 367 (Springer, 1985).
- 720 41. Inoue, F. *et al.* A systematic comparison reveals substantial differences in

- 721 chromosomal versus episomal encoding of enhancer activity. *Genome Res.* **27**, 38-  
722 52 (2017).
- 723 42. Weatheritt, R.J. & Babu, M.M. The hidden codes that shape protein evolution.  
724 *Science* **342**, 1325-1326 (2013).
- 725 43. Kuo, Y.-M., Henry, R.A. & Andrews, A.J. A quantitative multiplexed mass  
726 spectrometry assay for studying the kinetic of residue-specific histone acetylation.  
727 *Methods* **70**, 127-133 (2014).
- 728 44. Berndsen, C.E. *et al.* Molecular functions of the histone acetyltransferase  
729 chaperone complex Rtt109–Vps75. *Nat. Struct. Mol. Biol.* **15**, 948-956 (2008).
- 730 45. Zarin, T., Tsai, C.N., Ba, A.N.N. & Moses, A.M. Selection maintains signaling  
731 function of a highly diverged intrinsically disordered region. *Proc. Natl. Acad. Sci.*  
732 *USA* **114**, 1450-1459 (2017).
- 733 46. Studer, A.J., Wang, H. & Doebley, J.F. Selection during maize domestication  
734 targeted a gene network controlling plant and inflorescence architecture. *Genetics*  
735 **207**, 755-765 (2017).
- 736 47. Lo, K.A. *et al.* Genome-wide profiling of H3K56 acetylation and transcription  
737 factor binding sites in human adipocytes. *PLoS One* **6**, e19778 (2011).
- 738 48. Carroll, J.S. *et al.* Genome-wide analysis of estrogen receptor binding sites. *Nat.*  
739 *Genet.* **38**, 1289-1297 (2006).
- 740 49. Stergachis, A.B. *et al.* Exonic transcription factor binding directs codon choice and  
741 affects protein evolution. *Science* **342**, 1367-1372 (2013).
- 742 50. Sabari, B.R., Zhang, D., Allis, C.D. & Zhao, Y. Metabolic regulation of gene  
743 expression through histone acylations. *Nat. Rev. Mol. Cell Biol.* **18**, 90-101 (2017).
- 744 51. Lee, K.K. & Workman, J.L. Histone acetyltransferase complexes: one size doesn't  
745 fit all. *Nat. Rev. Mol. Cell Biol.* **8**, 284-295 (2007).
- 746 52. Doi, M., Hirayama, J. & Sassone-Corsi, P. Circadian regulator CLOCK is a histone  
747 acetyltransferase. *Cell* **125**, 497-508 (2006).
- 748 53. Kawasaki, H. *et al.* ATF-2 has intrinsic histone acetyltransferase activity which is  
749 modulated by phosphorylation. *Nature* **405**, 195-200 (2000).



## 750 **Methods**

### 751 **Experimental materials**

752 The cucumber (*Cucumis sativus* L.) inbred line 404 (WT) and its BC<sub>3</sub>S<sub>2</sub> mutant tendril  
753 near-isogenic line 404-38 (*ten*) were used for genome-wide ChIP-seq, FAIRE-seq and  
754 RNA-seq analyses. After seed germination, 100 plants of each line were grown, in a  
755 greenhouse, in pots containing mixed peat moss and vermiculite (v/v = 1:1) and were  
756 transplanted to soil at the three-leaf stage. Pest control was performed according to  
757 standard management practices.

758 The cucumber inbred line CU2 was used in cucumber transformation. Seeds were  
759 soaked in distilled water, at 50°C for 30 min. Seed coats were removed, and the naked  
760 seed was then surface-sterilized by sequential immersion in 70% ethanol for 15 s and  
761 0.6% sodium hypochlorite solution for 15 min, followed by eight rinses in sterile  
762 distilled water. Sterilized seeds were spread on 1× Murashige and Skoog medium  
763 (Phytotech, Cat. #M519), supplemented with 2 mg/L 6-Benzylaminopurine (Sigma,  
764 Cat. #B3408) and 1 mg/L ABA (Phytotech, Cat. #A102), for two days at 28°C.  
765 Cotyledons were excised from germinated seedlings and infected with *Agrobacterium*.  
766 Subsequently, after shoot regeneration, elongation, and rooting processes, the rooted  
767 plants were transplanted to the greenhouse.

768 For transient expression analysis, tobacco plants (*Nicotiana benthamiana*) were  
769 grown in pots containing mixed peat moss and vermiculite (v/v = 1:1) in a growth  
770 chamber with a light regime of 16 h light/8 h dark at 22°C.

### 771 **Plasmid construction and plant transformation**

772 To generate CRISPR/Cas9 engineered mutations in the *TEN* gene, a binary  
773 CRISPR/Cas9 vector pBSE402 plus a *35S-GFP* expression cassette was modified from  
774 pBSE401a<sup>54</sup>. For assembly of *TEN* sgRNA into pBSE402, equal volumes of 100 μM  
775 forward and reverse primers were mixed, incubated at 95°C for 5 min, and slowly  
776 cooled to room temperature, resulting in a double stranded DNA fragment with sticky  
777 BsaI ends. This short DNA fragment was then assembled into pBSE402, by restriction  
778 fragment ligation, using BsaI and T4 Ligase (New England Biolabs). Primers are shown

779 in Supplementary Table 8. *Agrobacterium tumefaciens* strain EH105, carrying a  
780 pBSE402-TEN construct, was used to transform the cucumber inbred line CU2, using  
781 cotyledonary nodes as explants, as previously described<sup>55</sup>. Shoot regeneration,  
782 elongation and rooting processes strictly followed normative procedures.

783 Genomic DNA was extracted from the positive transgenic plants using the DNeasy  
784 Plant Mini Kit (Qiagen, Cat. #69104). PCR was performed using gene-specific primers  
785 (Supplementary Table 8). PCR products were cloned into pEASY-Blunt Zero  
786 (TRANSGEN BIOTECH, Cat. #CB501) and the various alleles for the *TEN* gene were  
787 identified by sequencing.

### 788 **ChIP-seq and ChIP-qPCR**

789 ChIP assays were performed, as described previously<sup>56</sup>, with some modifications.  
790 Briefly, normal tendrils (WT), at coiling stage (the status at which the tendril attaches  
791 to a support, but before free tendril coiling occurs), mutant tendrils of *ten-3* (at the  
792 corresponding growth status where the tendril would normally be attaching to a support)  
793 and *ten-1* mutants (at the corresponding growth status where the modified tendrils show  
794 slight curling of petioles) (Fig. 1g) were used in ChIP assays for two biological  
795 replicates. Harvested tendrils (30 g of each material divided into 10 equal samples) were  
796 fixed in cross-linking buffer (10 mM sodium phosphate, pH 7.0, 50 mM NaCl, 0.1 M  
797 sucrose, and 1% formaldehyde) under vacuum for 10 min. Fixation was stopped by  
798 incubation in 0.25 M glycine for an additional 10 min. Tendril material was then ground,  
799 in liquid nitrogen, and 3 g aliquots of powdered tissue were resuspended in 30 mL of  
800 extraction buffer (0.4 M sucrose, 10 mM Tris-HCl pH 8.0, 5 mM  $\beta$ -mercaptoethanol, 1  
801 mM PMSF, and Protease Inhibitor cocktail). Chromatin isolation was performed, as  
802 described previously<sup>56</sup>, and then sonicated (Ningbo Scientz Biotechnology, JY96-IIN)  
803 for 12 cycles, each with a 15 s pulse at 70% of maximal power, followed by a 45 s  
804 cooling period, on ice, to achieve an average DNA size of 200 bp for  
805 immunoprecipitation. The following antibodies were used for ChIP assays: TEN  
806 antibody, anti-H3K56ac (active motif, Cat. #39282) and anti-H3K122ac (Abcam, Cat.  
807 #Ab33309) (Supplementary Table 9). ChIP products were combined and eluted into 50  
808  $\mu$ L of TE buffer for ChIP-seq (5 ng DNA) or ChIP qPCR (1  $\mu$ L aliquot).

809 ChIP-qPCR was performed, as described previously<sup>56</sup>. Primers are listed in  
810 Supplementary Table 8, and *UBQ* (*Csa3G778350*), the ubiquitin gene, was used as a  
811 negative control. The qPCR signals derived from the ChIP samples were normalized to  
812 the signals derived from the input DNA control sample. The value (percentage of input;  
813 input %) was calculated by the  $2^{-\Delta Ct}$  method.

#### 814 **FAIRE**

815 FAIRE assays were performed, as described previously<sup>57</sup>. Normal tendrils (WT), at the  
816 coiling stage, and mutant tendrils (*ten-3* and *ten-1* mutants), at the corresponding  
817 growth stage, were used in FAIRE assays. Two grams of tissue were fixed with  
818 formaldehyde and regulatory elements were isolated. FAIRE DNA was dissolved into  
819 30  $\mu$ L of TE buffer for FAIRE-seq (5 ng DNA) or FAIRE qPCR (1  $\mu$ L aliquot). Two  
820 biological replicates were performed for each FAIRE assay.

821 qPCR was performed on crosslinked and non-crosslinked (input) FAIRE samples.  
822 The ubiquitin gene, *UBQ*, was used as a negative control. Lists of all primers used are  
823 given in Supplementary Table 8. The value for DNA accessibility over that of input  
824 was obtained by the  $2^{-\Delta Ct}$  method.

#### 825 **RT-qPCR analyses**

826 Total RNA was isolated using an RNA extraction Kit (Qiagen, Cat. #74903). First-  
827 strand cDNA was synthesized from 1  $\mu$ g total RNA using the M-MLV Reverse  
828 Transcriptase (Promega, Cat. #M1705) (primers are listed in Supplementary Table 8).  
829 Primer specificity was checked by sequencing and blast analysis. qPCRs were  
830 performed on an ABI 7900, using SYBR Premix (Roche, Cat. #4913914001),  
831 according to the manufacturer's instructions. Three technical replicates and three  
832 independent biological experiments were performed in all cases. Relative gene  
833 expression was assessed using the comparative  $2^{-\Delta\Delta Ct}$  method. *UBQ* was used as an  
834 internal reference gene.

#### 835 **High-throughput sequencing**

836 ChIP-seq or FAIRE-seq libraries were prepared using the Illumina ChIP-seq DNA  
837 Sample Prep kit, according to manufacturer's instructions, with the following  
838 modifications: mRNA adaptor indexes from the TruSeq RNA kit were used, and  
839 enrichment PCR was also performed with reagents from the Illumina TruSeq mRNA  
840 kit. The enriched libraries were purified, with AMPure magnetic beads (Agencourt),  
841 the concentrations checked with Qubit (Invitrogen), and the distribution and size of  
842 fragments were confirmed with a Bioanalyzer (Agilent). Four samples were pooled in  
843 equimolar quantity and sequenced on a HiSeq2500 (single read, 50 bp) to yield up to  
844 30 million reads per sample. The obtained reads were demultiplexed with Illumina  
845 CASAVA 1.8 software.

846 RNA-seq libraries were developed from five biological replicates from tendrils  
847 (WT) and mutant tendrils (*ten*). The 100 bp paired-end reads (2.4 Gb, 10×) for each  
848 sample were generated from the RNA-seq libraries with an Illumina HiSeq 2500  
849 sequencer.

## 850 **Mapping of sequencing reads and data analysis**

851 All sequencing reads were mapped to the cucumber genome, using bowtie software  
852 (<http://bowtie-bio.sourceforge.net>)<sup>58</sup>, with default parameters, except for discarding  
853 multiple loci-matching reads that might introduce error signals by repeat counting.

854 For computational processing of ChIP-seq: Peaks for TEN and TEN<sup>N338Y</sup> were  
855 identified by the model-based analysis software MACS (<http://liulab.dfci.harvard.edu/MACS/>)<sup>59</sup>, using input DNA as a control. MACS default parameters were used,  
856 except for detecting more reliable TEN association signals with  $-mfold = 0, 30$  and fold  
857 enrichment  $\geq 2$ . Peaks for H3K56ac and H3K122ac were identified by RSEG software  
858 (<https://github.com/smithlabcode/rseg>)<sup>60</sup>, under default parameters, using input DNA  
859 as a control. For computational processing of FAIRE-seq data: Data peaks were  
860 identified by F-Seq software (<http://fureylab.web.unc.edu/software/fseq/>)<sup>61</sup>, using input  
861 DNA as a control. Heatmap graphs of peaks were plotted using deeptools software  
862 (<https://github.com/deeptools/deepTools>) with normalization to 1×.

864 For computational processing, RNA-seq data were mapped to the cucumber  
865 genome, using tophat2 software (<http://tophat.cbcb.umd.edu/>)<sup>62</sup>, with default

866 parameters. According to the cucumber genome annotation, all mapped reads were then  
867 assembled into known transcripts by Cufflink software. Next, the expression of  
868 transcripts was calculated in fragments per kilobase of exon model per million mapped  
869 fragments.

870 The putative DNA-binding motifs in the TEN binding peaks were searched using  
871 MEME-ChIP software<sup>63</sup> (the online version 5.0.5), by using the default background  
872 model of MEME-ChIP. The background model is normalized for biased distribution of  
873 letters in the input sequences.

#### 874 **Purification of TEN protein from Sf9 insect cells and *E.coli***

875 The cDNA of *TEN*, *TEN*<sup>N338Y</sup>, *N121* and  $\Delta$ *N121* was cloned into pFast-FH vector  
876 (inserting a FLAG tag into pFast-HTB, Life Technologies, Cat. #10712-024),  
877 respectively. Primers for constructing these vectors are shown in Supplementary Table  
878 8. Bacmid preparation and insect cell transfection were conducted using the Bac-to-  
879 Bac® Baculovirus Expression System, according to the manufacturer's instructions.  
880 The isolated P3 recombinant baculoviruses were added to the cultured Sf9 cells, at a  
881 volume ratio of 1:100. Cells were collected after another 48–60 h of cultivation at 27°C  
882 and 110 rpm in Nalgene conical flasks.

883 Insect cells that expressed recombinant proteins were resuspended and sonicated  
884 in lysis buffer (50 mM HEPES-KOH, pH 7.5, 500 mM NaCl, 5% glycerol). Cell lysates  
885 were centrifuged at 16,000 × g for 60 min at 4°C. The supernatants from cell lysates  
886 were loaded onto a gravity column (Bio-Rad, Cat. #732-1010) filled with 2 mL Anti-  
887 FLAG M2 Affinity Gel (Sigma, Cat. #A2220), and bound proteins were eluted with a  
888 FLAG elution buffer (50 mM HEPES-KOH, pH 7.5, 500 mM NaCl, 5% glycerol, 0.4  
889 mg/mL 1× FLAG peptide). The eluate was concentrated to 2 mL and then loaded onto  
890 a Superdex 200 column (GE Healthcare, Cat. #10034543) for size exclusion  
891 chromatography (S200 buffer: 50 mM Hepes-KOH, pH 7.5, 500 mM NaCl, 5%  
892 glycerol, 1 mM DTT). The fractions containing target protein were collected and  
893 constituted the purified protein.

894 The cDNA of a series of N-terminal sequences, including the N121, the point  
895 mutated N121 and N-termini of the TB1 TF family, were cloned into the pET22b vector,

896 fused to the N-terminus with a 6× His-tag. The resultant plasmid was transformed to *E.*  
897 *coli* BL21(DE3), then identified by PCR, double enzyme digesting (*Ned* I and *Xho* I)  
898 and sequenced. Expression of the recombinant N121 protein was induced, with 0.2 mM  
899 isopropyl thiogalactoside for 5 h at 26°C, and then affinity purified, using lysis buffer  
900 (25 mM Tris-HCl, pH 7.5, 500 mM NaCl), in combination with an Ni<sup>2+</sup>-chelating  
901 Sepharose Fast Flow (Amersham Biosciences) column, following the manufacturer's  
902 instructions.

### 903 **Electrophoretic mobility-shift assays (EMSA)**

904 EMSA was performed using recombinant MBP-TCP, MBP-TCP+R, FLAG-ΔN121,  
905 FLAG-TEN, or FLAG-TEN<sup>N338Y</sup> protein purified from insect cells. DNA probes  
906 containing the CTCCGCC motif, mutant CTAAGCC motif, or a GTGGTCCCAC motif,  
907 used for the EMSA, were synthesized and amplified, by PCR, using the biotin-labeled  
908 primers listed in Supplementary Table 8. Binding reactions were performed in 20 μL  
909 of binding buffer, composed of 10 mM Tris-HCl, pH 7.5, 200 mM NaCl, 10 mM KCl,  
910 1 mM MgCl<sub>2</sub>, 10 μM ZnCl<sub>2</sub>, 0.5 mg/mL BSA, 0.02 mg/mL of poly (deoxyinosinic-  
911 deoxycytidylic) sodium salt [poly (dI-dC)] (Thermo Scientific, Cat. #20148E), 1 mM  
912 DTT and 10% glycerol. Binding reactions were carried out using 0, 100 or 200 ng of  
913 recombinant protein and 5 nM of each biotin-labeled probe, at 4°C for 1 h. Samples  
914 were separated on 6% polyacrylamide gels (19:1 acryl:bisacrylamide) in Tris-borate-  
915 EDTA, at 4°C. After the sample transfer, the PVDF membrane was exposed under  
916 ultraviolet light to cross-link the samples, and then blocked with blocking reagent  
917 (provided in the kit) for 15 min. Biotin signal was visualized using a Chemiluminescent  
918 Nucleic Acid Detection Module kit (Thermo Scientific, Cat. #89880). Competition  
919 experiments were performed using from 100- or 1000-fold levels of unlabeled  
920 fragments.

### 921 **Expression and purification of recombinant histones**

922 Recombinant histones were expressed in BL21 (DE3) pLysS. Single colonies were  
923 grown in 1 L of lysogeny broth (LB) medium at 37 °C until reaching an optical density  
924 at 600 nm (OD<sub>600</sub>) = 0.6, and induced with 0.5 mM IPTG for 2 h. Cells were harvested  
925 by centrifugation, at 5,000 × g, and resuspended in lysis buffer (50 mM Tris, 100 mM

926 NaCl, 1 mM EDTA, 1 mM 2-mercaptoethanol, pH 7.5). Cells were lysed, by sonication,  
927 and then centrifuged at  $30,000 \times g$ .

928 For histone purification, inclusion bodies from 1L bacterial culture were washed  
929 by resuspension in 100 mL wash buffer, plus 1% Triton X-100, and then centrifuged  
930 for 10 min at  $4^\circ\text{C}$  at  $23,000 \times g$ . This step was repeated, once, with wash buffer plus  
931 Triton X-100, and twice with wash buffer. The pellet was solubilized in 30 mL  
932 unfolding buffer (7 M guanidium hydrochloride, 20 mM Tris, pH 7.5, 10 mM DTT) for  
933 1 h, at RT. After centrifugation the supernatant was analyzed by SDS-PAGE.

### 934 **Histone tetramer and octamer reconstitution**

935 For histone H3-H4 tetramer or histone octamer reconstitution, histone H3, H4 or H2A,  
936 H2B, H3 and H4 were mix, at equimolar amounts, and then dialyzed at  $4^\circ\text{C}$  against  
937 three changes of 2 L freshly-prepared refolding buffer (2 M NaCl, 10 mM Tris-HCl,  
938 pH 7.5, 1 mM EDTA, 5 mM  $\beta$ -mercaptoethanol) for 12 h. Next, the mixture was  
939 dialyzed for another 12 h, in 2 L fresh refolding buffer. After centrifugation, the  
940 supernatant was collected and concentrated to a final volume of 500  $\mu\text{L}$ . Following a  
941 minimum of three centrifugation steps, the cleared supernatant was loaded onto a  
942 Superdex200 gel filtration column and equilibrated with refolding buffer. The purity  
943 and stoichiometry of eluted fractions were checked by SDS-PAGE. Histone H3-H4  
944 tetramer or histone octamer peak fractions were collected, together, and store at  $-80^\circ\text{C}$ .

### 945 ***In vitro* nucleosome assembly**

946 Mononucleosomes were assembled on 208 bp (5S rDNA) DNA fragments. Before  
947 adding octamer, the salt concentration of the DNA solution was adjusted to 2 M, using  
948 5 M NaCl and TE. DNA and histone octamers were mixed at a 1:1.05 molar ratio in 2  
949 M NaCl buffer. A peristaltic pump was used for continuous dialysis against 450 mL of  
950 refolding buffer (2 M NaCl, 10 mM Tris-HCl, pH 7.5, 1 mM EDTA, 5 mM  $\beta$ -  
951 mercaptoethanol) for 16 h at  $4^\circ\text{C}$ , under constant stirring, with continuous addition of  
952 TE buffer, into the dialysis buffer, to reduce the salt concentration to 0.6 M. Samples  
953 were collected after final dialysis in HE buffer (10 mM Hepes, pH 8.0, 0.1 mM EDTA)  
954 for 4 h. The assembled nucleosomes were visualized on 2% agarose gels.



## 955 **Histone acetyltransferase assay**

956 HAT assays were performed in a 30  $\mu$ L reaction medium, using either 0.5  $\mu$ g of  
957 recombinant histone H3 (Millipore, Cat. #14-411), 2  $\mu$ g of chicken core histones  
958 (Millipore, Cat. #14-411), 1  $\mu$ g H3-H4 tetramer, 2  $\mu$ g histone octamer or 2  $\mu$ g  
959 mononucleosome, in the presence of 1  $\mu$ Ci of  $^3$ H-acetyl-CoA (ARC, Cat. #0213A-50  
960  $\mu$ Ci) or 200  $\mu$ M acetyl-CoA. Enzymatic reactions were performed using 100 nM of  
961 purified FLAG-N121, and the same amount of FLAG-TEN, FLAG-TEN<sup>N338Y</sup>, FLAG-  
962  $\Delta$ N121 or commercial P300 protein. Reactions were incubated at 30°C for 2 h, and then  
963 7.5  $\mu$ L 5 $\times$  SDS-PAGE sample buffer was added, followed by boiling for 5 min. After  
964 being resolved on 15% SDS-PAGE, aliquots were subjected to LC-MS/MS,  
965 autoradiography or immunoblotting. For autoradiography, proteins were separated and  
966 transferred to a PVDF membrane, using a semi-dry blotter (TE70, GE Life Sciences).  
967  $^3$ H signal was detected with a BioMax Transcreen Intensifying Screen LE (Sigma, Cat.  
968 #Z374318) and BIOMAX MS films. For immunoblotting, the antibodies specific for  
969 different acetylated lysine residues were listed in Supplementary Table 9.

## 970 **LC-MS/MS analysis**

971 Equal protein amounts were separated by SDS-PAGE. The gel bands of histone H3  
972 protein were excised, reduced with 25 mM of DTT and alkylated with 55 mM  
973 iodoacetamide, followed by addition of propionic anhydride and in-gel digestion,  
974 overnight, with sequencing-grade modified trypsin, at 37°C. Peptides were extracted  
975 twice with 0.1% trifluoroacetic acid in 50% acetonitrile aqueous solution for 30 min  
976 and then dried in a speedvac. Peptides were redissolved in 25  $\mu$ L 0.1% trifluoroacetic  
977 acid and 6  $\mu$ L of extracted peptides were analyzed by Q Exactive HF-X mass  
978 spectrometer.

979 In LC-MS/MS analysis, digestion products were separated by a 120 min gradient  
980 elution, at a flow rate of 0.300  $\mu$ L/min, using a Dionex 3000 nano-HPLC system, which  
981 was directly interfaced with a Thermo Q Exactive HF-X mass spectrometer. The  
982 analytical column was a fused silica capillary column (75  $\mu$ m ID, 150 mm length;  
983 packed with C-18 resin). Mobile phase A consisted of 0.1% formic acid, and mobile  
984 phase B consisted of 80% acetonitrile and 0.08% formic acid. The Q Exactive mass  
985 spectrometer was operated in the data-dependent acquisition mode, using Xcalibur4.1

986 software, and a single full-scan mass spectrum in the Orbitrap (300-1800  $m/z$ , 12,000  
987 resolution) was followed by 40 data-dependent MS/MS scans. The MS/MS spectra  
988 from each LC-MS/MS run were searched against the selected database, using Proteome  
989 Discovery searching algorithm (version 1.4).

990 The MS/MS spectra from each LC-MS/MS run were searched against the Histone  
991 H3.fasta file. The search criteria were as follows: full tryptic specificity was required;  
992 two missed cleavages were allowed; carbamidomethylation<sup>©</sup> were set as the fixed  
993 modification; the oxidation (M), propionyl (P) and acetyl (K) were set as the variable  
994 modification; precursor ion mass tolerances were set at 20 ppm for all MS acquired in  
995 the orbitrap mass analyzer; and the fragment ion mass tolerance was set at 0.02 Da for  
996 all MS2 spectra acquired. The peptide false discovery rate (FDR) was calculated using  
997 Percolator provided by PD. When the  $q$  value was smaller than 1%, the peptide  
998 spectrum match (PSM) was considered to be correct. FDR was determined based on  
999 PSMs when searched against the reverse, decoy database. Peptides assigned only to a  
1000 given protein group were considered as unique. The FDR was also set to 0.01 for protein  
1001 identifications. The peak areas of fragment ions were used to calculate the relative  
1002 intensity of precursor ion for selected peptides.

### 1003 **Quantitative calculations for residue-specific histone acetylation**

1004 The method for quantitative calculation was performed, as described previously<sup>41</sup>. The  
1005 fraction of a specific peptide ( $F_s$ ) was calculated by Equation 1, where  $I_s$  was the  
1006 intensity of an acetylated peptide state, and  $I_p$  was the intensity of any state of that  
1007 peptide.

$$F_s = I_s / (\sum I_p) \quad \text{Equation 1}$$

1008 The concentration of acetylation at specific lysine residues was quantified and  
1009 calculated by multiplying the fraction  $F_s$  by the initial concentration of histone.

1010 For steady-state kinetic analyses, all models were fitted to the data, using Prism  
1011 (version 7.0). The initial rates ( $V$ ) of acetylation were calculated from the linear stage  
1012 in acetylation for a 10 min reaction time. To measure steady-state parameters for H3-  
1013 H4 tetramer,  $K_{cat}$  and  $K_m$  were determined based on the equation:

$$\frac{V}{[E]} = K_{\text{cat}} \frac{[S]}{K_m + [S]} \quad \text{Equation 2}$$

1014 where [S] was the concentration of substrate (H3-H4 tetramer), [E] was the  
1015 concentration of N121 protein, and V was the initial rate of acetylation.

#### 1016 **Protein extraction and detection by immunoblotting**

1017 The 18-residue peptide, LNNFTKKGSVKKDRHSC, spanning the N121 and TCP  
1018 domains, was selected as antigen for polyclonal antibody production. Two grams of  
1019 cucumber tendrils, or tobacco leaves, were harvested and ground to fine power in liquid  
1020 N2. Total protein was extracted using a protein extraction buffer (20 mM Tris-HCl, pH  
1021 7.5, 150 mM NaCl, 4 M Urea, 10% glycerol, 5 mM DTT, 1 mM PMSF and 1× protease  
1022 inhibitor cocktail). The samples were centrifuged at 12,000 × g at 4°C for 30 min. Total  
1023 protein was quantified using BCA Protein Assay Kit, according to the manufacturer's  
1024 instructions. And 20–50 µg protein sample was resolved on 12.5% SDS-PAGE and  
1025 then transferred to a PVDF membrane, using a semi-dry blotter. Western blot analyses  
1026 were performed using antibodies listed in Supplementary Table 9. Immunoblotting  
1027 signal was visualized using a SuperSignal West Femto kit (Thermo Scientific).

#### 1028 **Immunolabelling**

1029 Half of each tobacco leaf was infiltrated with *A. tumefaciens* strains GV3101 expressing  
1030 c-Myc-TEN, and the other half without infiltration was used as a control. After 72 h  
1031 post infiltration, the entire tobacco leaf was cut into 0.5 cm × 1 cm pieces and fixed in  
1032 cold 4% paraformaldehyde in Tris-HCl buffer (10 mM Tris, pH 7.5, 100 mM NaCl, 10  
1033 mM EDTA) for 20 min. Leaf pieces were then washed, twice, using ice-cold Tris-HCl  
1034 buffer for 10 min each and nuclei were released by finely chopping in LB01 buffer (15  
1035 mM Tris-HCl, pH 7.5, 2 mM EDTA, 0.5 mM spermine, 80 mM KCl, 20 mM NaCl,  
1036 0.1% Triton X-100), followed by filtration through a cell strainer cup (BD falcon).  
1037 Nuclei in the flow-through were then 1:4 diluted in sorting buffer (100 mM Tris, pH  
1038 7.5, 50 mM KCl, 2 mM MgCl<sub>2</sub>, 0.05% Tween 20, 5% sucrose), spotted onto microscopy  
1039 slides, and air-dried. After post-fixation with 4% paraformaldehyde in PBS buffer (10  
1040 mM sodium phosphate, pH 7.0, 143 mM NaCl), slides were used for immunolabelling.  
1041 Double labeling was performed using the c-Myc antibody (1:200), H3K56ac antibody

1042 (1:500) and H3K122ac antibody (1:500). C-Myc-TEN was detected by FITC-  
1043 conjugated goat anti-rabbit (1:200, ZSGB-BIO) secondary antibodies, and each specific  
1044 histone acetylation was visualized by TRITC-conjugated goat anti-rabbit (1:200,  
1045 ZSGB-BIO) secondary antibodies. After staining, slides were mounted in mounting  
1046 medium with DAPI and then photographed on a Leica TCS SP8 confocal microscope.  
1047 More than fifty pairs of transfected nuclei versus non-transfected nuclei, in the same  
1048 field of view, were observed to collect consistent results.

#### 1049 **Immunoprecipitation**

1050 Immunoprecipitation was performed to enrich the TEN protein for detection and LC-  
1051 MS/MS analysis. 10 mg total tendril protein from the supernatants was incubated with  
1052 an excess amount of anti-TEN antibody, at 4°C overnight with rotation, followed by  
1053 addition of 50 µL Protein A Dynal beads (Thermo Scientific, Cat. #10002D) for an  
1054 additional 2 h. Beads were then washed, 3 three times, with extraction buffer. Half of  
1055 the immunoprecipitates was analyzed by immunoblotting with anti-TEN antibody, and  
1056 the other half was resolved on 12.5% SDS-PAGE for LC-MS/MS analysis.

#### 1057 **Transient expression in tobacco leaves**

1058 TEN, TEN-N121, TEN-ΔN121 and TEN-ΔC130, fused with 5 × c-Myc tag peptides  
1059 (EQKLISEEDL), were cloned into a binary vector (pCAMBIA1300) downstream of  
1060 the 35S promoter, using the primers listed in Supplementary Table 8. Constructs were  
1061 transformed into *A. tumefaciens* strain GV3101. After cultivation, overnight, cells were  
1062 harvested by centrifugation and resuspended in 10 mM MES (pH 5.6) buffer containing  
1063 10 mM MgCl<sub>2</sub> and 200 µM acetosyringone (Sigma, Cat. #D134406) at OD<sub>600</sub> = 1.0.  
1064 After incubation, at room temperature for 3 h, in the dark, the *Agrobacterium*  
1065 suspension was infiltrated into leaves of one-month-old tobacco plants from the adaxial  
1066 side, using a needleless syringe. Leaf samples were harvested after 3 days and used for  
1067 immunoblotting or immunolabelling analyses. These experiments were repeated,  
1068 independently, at least three times with similar results.

#### 1069 **Data availability**

- 1070 Raw data were deposited at the Sequence Read Archive (SRA) under accession  
1071 number PRJNA520931.
- 1072
- 1073 54. Chen, Y. *et al.* CRISPR/Cas9-mediated base-editing system efficiently generates  
1074 gain-of-function mutations in Arabidopsis. *Sci. China Life Sci.* **60**, 520-523 (2017).
- 1075 55. Hu, B. *et al.* Engineering non-transgenic gynoecious cucumber using an improved  
1076 transformation protocol and optimized CRISPR/Cas9 system. *Mol. Plant* **10**,  
1077 1575-1578 (2017).
- 1078 56. Zhu, J.-Y., Sun, Y. & Wang, Z.-Y. Genome-wide identification of transcription  
1079 factor-binding sites in plants using chromatin immunoprecipitation followed by  
1080 microarray (ChIP-chip) or sequencing (ChIP-seq). In *Plant Signalling Networks*  
1081 173-188 (Springer, 2011).
- 1082 57. Simon, J.M., Giresi, P.G., Davis, I.J. & Lieb, J.D. Using formaldehyde-assisted  
1083 isolation of regulatory elements (FAIRE) to isolate active regulatory DNA. *Nat.*  
1084 *Protoc.* **7**, 256-267 (2012).
- 1085 58. Langmead, B., Trapnell, C., Pop, M. & Salzberg, S.L. Ultrafast and memory-  
1086 efficient alignment of short DNA sequences to the human genome. *Genome Biol.*  
1087 **10**, R25 (2009).
- 1088 59. Zhang, Y. *et al.* Model-based analysis of ChIP-Seq (MACS). *Genome Biol.* **9**,  
1089 R137 (2008).
- 1090 60. Song, Q. & Smith, A.D. Identifying dispersed epigenomic domains from ChIP-  
1091 Seq data. *Bioinformatics* **27**, 870-871 (2011).
- 1092 61. Boyle, A.P., Guinney, J., Crawford, G.E. & Furey, T.S. F-Seq: a feature density  
1093 estimator for high-throughput sequence tags. *Bioinformatics* **24**, 2537-2538 (2008).
- 1094 62. Trapnell, C. *et al.* Differential gene and transcript expression analysis of RNA-seq  
1095 experiments with TopHat and Cufflinks. *Nat. Protoc.* **7**, 562-578 (2012).
- 1096 63. Bailey, T.L., Williams, N., Misleh, C. & Li, W.W. MEME: discovering and  
1097 analyzing DNA and protein sequence motifs. *Nucleic Acids Res.* **34**, 369-373  
1098 (2006).
